# Supplementary material for: Genetically Raised Circulating Bilirubin Levels and Risk of Ten Cancers: A Mendelian Randomization Study
Source: PubMed Central journal article supplement (PMC7918902; doi:10.3390/cells10020394), 2021-02-15
Supplement: cells-10-00394-s001.pdf [file cells-10-00394-s001.pdf]

## **Genetically raised circulating bilirubin levels and risk of ten cancers: a Mendelian randomization study**

Nazlisadat Seyed Khoei, Robert Carreras-Torres et al.

**Tables S1** Summary statistics for genetic association of total bilirubin levels and risk of ten cancers

**Tables S2** Results of sensitivity Mendelian randomization methods for total bilirubin levels and risk of ten cancers

**Figures S1** Scatter plots depicting the genetic associations between bilirubin levels and risk of pancreatic cancer and renal cell carcinoma, overall and sex subgroups

**Figures S2** Scatter plots depicting the genetic associations between bilirubin levels and lung cancer risk, overall, smoking subgroups, and histological subtypes

**Figures S3** Scatter plots depicting the genetic associations between bilirubin levels and risk of ovarian, endometrial, and breast cancers, overall and subtypes

**Figures S4** Scatter plots depicting the genetic association between bilirubin levels and prostate cancer risk.

**Figures S5** Scatter plots depicting the genetic associations between bilirubin levels and risk of Hodgkin's lymphoma, melanoma, and neuroblastoma.

### **Funding Sources and Acknowledgements**

Table S1 | Summary statistics for genetic association of total bilirubin levels and risk of ten cancers

| SNPs             | Chromosome | Base pair position | Effect allele | Reference allele | Total bilirubin |              |                        | Pancreatic cancer overall |              | Pancreatic cancer in men |              | Pancreatic cancer in women |              | Renal cell cancer overall |              | Renal cell cancer in men |              | Renal cell cancer in women |              | Lung cancer overall |              | Lung cancer overall in ever smokers |              | Lung cancer overall in never smokers |              |
|------------------|------------|--------------------|---------------|------------------|-----------------|--------------|------------------------|---------------------------|--------------|--------------------------|--------------|----------------------------|--------------|---------------------------|--------------|--------------------------|--------------|----------------------------|--------------|---------------------|--------------|-------------------------------------|--------------|--------------------------------------|--------------|
|                  |            |                    |               |                  | Beta            | SE           | Explained variance (%) | Beta                      | SE           | Beta                     | SE           | Beta                       | SE           | Beta                      | SE           | Beta                     | SE           | Beta                       | SE           | Beta                | SE           | Beta                                | SE           | Beta                                 | SE           |
| rs2375279        | 1          | 25541931           | C             | T                | 0.022           | 0.004        | 1.29E-04               | -0.031                    | 0.033        | 0.008                    | 0.045        | -0.078                     | 0.049        | 0.006                     | 0.025        | -0.026                   | 0.047        | 0.062                      | 0.060        | -0.007              | 0.017        | -0.001                              | 0.021        | 0.028                                | 0.051        |
| rs17513135       | 1          | 40035686           | C             | T                | 0.018           | 0.003        | 1.17E-04               | -0.031                    | 0.028        | -0.049                   | 0.038        | -0.007                     | 0.042        | 0.012                     | 0.021        | 0.065                    | 0.040        | -0.025                     | 0.051        | 0.006               | 0.014        | -0.002                              | 0.017        | 0.073                                | 0.041        |
| rs6682423        | 1          | 63171063           | T             | C                | 0.021           | 0.003        | 1.98E-04               | -0.027                    | 0.025        | -0.034                   | 0.034        | -0.019                     | 0.037        | -0.010                    | 0.019        | 0.009                    | 0.037        | 0.041                      | 0.046        | -0.012              | 0.012        | -0.011                              | 0.016        | -0.019                               | 0.038        |
| rs1762486        | 1          | 107627697          | A             | G                | 0.020           | 0.003        | 1.78E-04               | -0.044                    | 0.026        | -0.048                   | 0.035        | -0.043                     | 0.038        | 0.000                     | 0.020        | -0.017                   | 0.038        | 0.037                      | 0.048        | -0.001              | 0.013        | -0.006                              | 0.016        | -0.024                               | 0.038        |
| rs61812598       | 1          | 154420087          | A             | G                | 0.016           | 0.003        | 1.24E-04               | -0.010                    | 0.024        | 0.012                    | 0.033        | -0.034                     | 0.036        | -0.014                    | 0.019        | -0.042                   | 0.036        | -0.042                     | 0.045        | 0.011               | 0.012        | 0.016                               | 0.015        | -0.024                               | 0.036        |
| rs857725         | 1          | 158607935          | T             | G                | 0.033           | 0.003        | 4.33E-04               | -0.037                    | 0.027        | -0.040                   | 0.036        | -0.037                     | 0.040        | -0.017                    | 0.020        | -0.046                   | 0.038        | -0.009                     | 0.049        | -0.026              | 0.013        | -0.008                              | 0.016        | -0.086                               | 0.040        |
| rs788644         | 1          | 202256962          | G             | T                | 0.018           | 0.003        | 1.56E-04               | 0.030                     | 0.024        | -0.004                   | 0.032        | 0.070                      | 0.036        | -0.024                    | 0.018        | 0.014                    | 0.034        | -0.009                     | 0.044        | -0.006              | 0.012        | 0.008                               | 0.015        | -0.015                               | 0.035        |
| rs1874121        | 1          | 220969049          | T             | C                | 0.023           | 0.003        | 2.47E-04               | 0.034                     | 0.026        | -0.002                   | 0.035        | 0.076                      | 0.038        | 0.000                     | 0.020        | -0.062                   | 0.038        | 0.020                      | 0.048        | -0.002              | 0.013        | -0.002                              | 0.017        | -0.017                               | 0.039        |
| rs556107         | 1          | 234853059          | T             | C                | 0.021           | 0.003        | 2.28E-04               | -0.038                    | 0.024        | -0.043                   | 0.032        | -0.032                     | 0.036        | 0.005                     | 0.018        | -0.013                   | 0.036        | 0.017                      | 0.044        | 0.007               | 0.012        | -0.003                              | 0.015        | 0.036                                | 0.035        |
| rs13030095       | 2          | 26026598           | A             | G                | 0.015           | 0.003        | 9.79E-05               | -0.016                    | 0.026        | 0.012                    | 0.036        | -0.047                     | 0.039        | -0.004                    | 0.020        | -0.028                   | 0.039        | -0.012                     | 0.049        | 0.014               | 0.013        | -0.007                              | 0.017        | 0.041                                | 0.039        |
| rs2053799        | 2          | 32883197           | G             | A                | 0.015           | 0.003        | 1.03E-04               | 0.021                     | 0.024        | 0.013                    | 0.033        | 0.025                      | 0.036        | 0.012                     | 0.019        | -0.018                   | 0.036        | 0.085                      | 0.044        | 0.012               | 0.012        | 0.027                               | 0.015        | -0.056                               | 0.036        |
| rs4671605        | 2          | 64887382           | T             | C                | 0.021           | 0.003        | 1.65E-04               | 0.034                     | 0.027        | -0.005                   | 0.037        | 0.077                      | 0.040        | 0.040                     | 0.021        | 0.044                    | 0.039        | 0.035                      | 0.050        | 0.018               | 0.013        | 0.018                               | 0.017        | -0.026                               | 0.039        |
| rs6734238        | 2          | 113841030          | A             | G                | 0.023           | 0.003        | 2.46E-04               | -0.002                    | 0.024        | 0.037                    | 0.033        | -0.046                     | 0.036        | -0.022                    | 0.019        | 0.005                    | 0.036        | -0.006                     | 0.045        | -0.008              | 0.012        | -0.016                              | 0.015        | 0.045                                | 0.036        |
| rs1047891        | 2          | 211540507          | A             | C                | 0.023           | 0.003        | 2.36E-04               | -0.013                    | 0.026        | -0.020                   | 0.036        | -0.006                     | 0.040        | 0.009                     | 0.021        | -0.029                   | 0.040        | 0.051                      | 0.050        | -0.001              | 0.013        | 0.002                               | 0.016        | -0.002                               | 0.038        |
| rs6731997        | 2          | 232560411          | G             | A                | 0.017           | 0.003        | 9.89E-05               | 0.055                     | 0.029        | 0.046                    | 0.039        | 0.069                      | 0.043        | -0.029                    | 0.022        | 0.014                    | 0.041        | 0.006                      | 0.051        | -0.012              | 0.014        | -0.030                              | 0.018        | 0.063                                | 0.043        |
| rs4973588        | 2          | 233834975          | A             | G                | 0.035           | 0.004        | 2.97E-04               | 0.012                     | 0.033        | 0.034                    | 0.044        | -0.014                     | 0.049        | -0.017                    | 0.025        | -0.023                   | 0.048        | -0.057                     | 0.060        | 0.012               | 0.016        | -0.002                              | 0.020        | 0.097                                | 0.047        |
| <b>rs6431625</b> | <b>2</b>   | <b>234637912</b>   | <b>C</b>      | <b>T</b>         | <b>0.598</b>    | <b>0.002</b> | <b>0.169</b>           | <b>0.014</b>              | <b>0.024</b> | <b>0.036</b>             | <b>0.033</b> | <b>-0.013</b>              | <b>0.036</b> | <b>0.005</b>              | <b>0.019</b> | <b>0.003</b>             | <b>0.037</b> | <b>0.059</b>               | <b>0.046</b> | <b>-0.012</b>       | <b>0.012</b> | <b>-0.028</b>                       | <b>0.015</b> | <b>-0.004</b>                        | <b>0.036</b> |
| rs10929023       | 2          | 235169902          | G             | A                | 0.023           | 0.003        | 2.14E-04               | -0.001                    | 0.026        | 0.020                    | 0.036        | -0.029                     | 0.039        | 0.040                     | 0.020        | -0.044                   | 0.039        | 0.034                      | 0.050        | 0.007               | 0.013        | 0.009                               | 0.017        | -0.021                               | 0.039        |
| rs2267846        | 3          | 48556339           | A             | G                | 0.017           | 0.003        | 1.08E-04               | 0.059                     | 0.027        | 0.083                    | 0.036        | 0.029                      | 0.040        | 0.014                     | 0.020        | 0.057                    | 0.038        | -0.023                     | 0.049        | 0.018               | 0.013        | 0.020                               | 0.017        | -0.013                               | 0.041        |
| rs9826148        | 3          | 114464858          | C             | T                | 0.026           | 0.004        | 1.28E-04               | -0.066                    | 0.037        | -0.023                   | 0.049        | -0.118                     | 0.055        | 0.033                     | 0.028        | 0.007                    | 0.052        | 0.042                      | 0.066        | -0.001              | 0.019        | -0.023                              | 0.023        | 0.053                                | 0.054        |
| rs6779903        | 3          | 135720851          | T             | G                | 0.019           | 0.003        | 1.44E-04               | -0.016                    | 0.027        | -0.027                   | 0.036        | -0.003                     | 0.040        | -0.025                    | 0.020        | -0.029                   | 0.039        | 0.032                      | 0.048        | 0.024               | 0.013        | 0.012                               | 0.017        | 0.076                                | 0.039        |
| rs1052618        | 3          | 136574501          | A             | G                | 0.028           | 0.003        | 3.45E-04               | -0.021                    | 0.026        | 0.008                    | 0.035        | -0.053                     | 0.038        | -0.025                    | 0.020        | -0.064                   | 0.038        | 0.039                      | 0.046        | 0.011               | 0.013        | 0.011                               | 0.016        | 0.043                                | 0.038        |
| rs1482852        | 3          | 156798294          | A             | G                | 0.017           | 0.003        | 1.32E-04               | 0.035                     | 0.024        | 0.012                    | 0.033        | 0.068                      | 0.036        | -0.004                    | 0.019        | 0.006                    | 0.035        | -0.021                     | 0.043        | -0.002              | 0.012        | 0.013                               | 0.015        | -0.055                               | 0.036        |
| rs61791066       | 3          | 170713380          | C             | T                | 0.031           | 0.004        | 2.06E-04               | 0.011                     | 0.034        | 0.033                    | 0.047        | -0.012                     | 0.051        | 0.017                     | 0.026        | -0.083                   | 0.051        | 0.077                      | 0.063        | -0.025              | 0.017        | -0.025                              | 0.021        | -0.088                               | 0.052        |
| rs11917973       | 3          | 195838613          | T             | C                | 0.014           | 0.003        | 9.48E-05               | -0.012                    | 0.024        | -0.008                   | 0.033        | -0.017                     | 0.036        | -0.034                    | 0.019        | -0.014                   | 0.038        | -0.013                     | 0.047        | 0.005               | 0.012        | -0.003                              | 0.016        | -0.002                               | 0.037        |
| rs13092376       | 3          | 196516288          | C             | A                | 0.014           | 0.003        | 9.51E-05               | -0.017                    | 0.024        | -0.011                   | 0.033        | -0.028                     | 0.036        | -0.015                    | 0.019        | 0.017                    | 0.036        | -0.033                     | 0.045        | -0.022              | 0.012        | -0.026                              | 0.015        | 0.004                                | 0.036        |
| rs115558925      | 4          | 69765782           | A             | C                | 0.029           | 0.004        | 1.55E-04               | -0.033                    | 0.042        | -0.065                   | 0.057        | 0.008                      | 0.062        | -0.038                    | 0.032        | -0.035                   | 0.064        | -0.021                     | 0.078        | 0.009               | 0.022        | 0.024                               | 0.029        | -0.066                               | 0.065        |
| rs151450         | 4          | 88016514           | G             | A                | 0.017           | 0.003        | 1.45E-04               | -0.032                    | 0.024        | 0.012                    | 0.033        | -0.086                     | 0.036        | 0.013                     | 0.019        | 0.046                    | 0.035        | 0.049                      | 0.044        | -0.019              | 0.012        | -0.011                              | 0.015        | -0.032                               | 0.036        |
| rs1126673        | 4          | 100045616          | C             | T                | 0.020           | 0.003        | 1.66E-04               | 0.006                     | 0.025        | -0.023                   | 0.034        | 0.046                      | 0.038        | 0.005                     | 0.019        | 0.003                    | 0.036        | 0.049                      | 0.046        | 0.022               | 0.013        | 0.028                               | 0.016        | 0.002                                | 0.038        |
| rs79800919       | 4          | 124787383          | G             | A                | 0.026           | 0.004        | 1.36E-04               | 0.000                     | 0.037        | 0.003                    | 0.049        | -0.007                     | 0.054        | 0.043                     | 0.028        | 0.004                    | 0.051        | 0.049                      | 0.065        | 0.020               | 0.018        | 0.028                               | 0.023        | 0.029                                | 0.054        |
| rs11727331       | 4          | 145091680          | A             | G                | 0.040           | 0.006        | 1.55E-04               | -0.048                    | 0.059        | -0.029                   | 0.080        | -0.062                     | 0.089        | -                         | -            | -                        | -            | -                          | -            | -                   | -            | -                                   | -            | -                                    | -            |
| rs10003923       | 4          | 175086079          | C             | T                | 0.015           | 0.003        | 1.14E-04               | 0.031                     | 0.024        | 0.039                    | 0.032        | 0.021                      | 0.036        | 0.009                     | 0.018        | -0.086                   | 0.035        | 0.068                      | 0.044        | 0.009               | 0.012        | 0.002                               | 0.015        | 0.051                                | 0.037        |
| rs6869704        | 5          | 122833667          | T             | C                | 0.017           | 0.003        | 1.37E-04               | 0.009                     | 0.024        | 0.000                    | 0.032        | 0.017                      | 0.036        | 0.001                     | 0.018        | 0.016                    | 0.035        | -0.011                     | 0.043        | 0.004               | 0.012        | 0.015                               | 0.015        | 0.011                                | 0.035        |
| rs274555         | 5          | 131722951          | C             | T                | 0.018           | 0.003        | 1.51E-04               | -0.005                    | 0.024        | -0.010                   | 0.032        | 0.003                      | 0.036        | 0.011                     | 0.019        | 0.028                    | 0.036        | 0.004                      | 0.044        | 0.037               | 0.012        | 0.047                               | 0.015        | -0.022                               | 0.035        |
| rs12515233       | 5          | 158417109          | C             | A                | 0.019           | 0.003        | 1.05E-04               | -0.003                    | 0.031        | -0.031                   | 0.042        | 0.035                      | 0.047        | 0.020                     | 0.024        | -0.013                   | 0.046        | -0.068                     | 0.058        | -0.007              | 0.015        | 0.002                               | 0.020        | -0.122                               | 0.046        |
| rs72835688       | 6          | 12811955           | C             | T                | 0.030           | 0.005        | 1.02E-04               | -0.033                    | 0.054        | -0.081                   | 0.074        | 0.027                      | 0.080        | -                         | -            | -                        | -            | -                          | -            | -                   | -            | -                                   | -            | -                                    | -            |
| rs9379764        | 6          | 25414023           | G             | T                | 0.018           | 0.003        | 1.23E-04               | -0.001                    | 0.028        | 0.020                    | 0.038        | -0.028                     | 0.042        | -0.010                    | 0.022        | -0.012                   | 0.042        | 0.056                      | 0.052        | 0.015               | 0.014        | -0.002                              | 0.018        | 0.095                                | 0.041        |
| rs198851         | 6          | 26104632           | T             | G                | 0.047           | 0.003        | 5.59E-04               | 0.003                     | 0.034        | 0.002                    | 0.046        | 0.000                      | 0.050        | -0.012                    | 0.025        | -0.012                   | 0.049        | 0.054                      | 0.060        | -0.014              | 0.016        | -0.021                              | 0.021        | -0.017                               | 0.049        |
| rs200484         | 6          | 27775674           | A             | G                | 0.023           | 0.004        | 1.23E-04               | 0.014                     | 0.040        | 0.029                    | 0.053        | -0.002                     | 0.060        | 0.076                     | 0.030        | -0.019                   | 0.059        | 0.049                      | 0.075        | -0.112              | 0.019        | -0.135                              | 0.024        | 0.059                                | 0.060        |
| rs853684         | 6          | 28294550           | T             | C                | 0.024           | 0.003        | 2.84E-04               | 0.008                     | 0.025        | 0.015                    | 0.033        | 0.002                      | 0.037        | 0.021                     | 0.019        | 0.017                    | 0.036        | 0.033                      | 0.046        | -0.024              | 0.012        | -0.033                              | 0.015        | 0.032                                | 0.036        |
| rs9267488        | 6          | 31514247           | A             | G                | 0.022           | 0.004        | 1.22E-04               | -0.031                    | 0.038        | 0.010                    | 0.052        | -0.083                     | 0.057        | 0.108                     | 0.029        | 0.075                    | 0.059        | 0.027                      | 0.075        | -0.151              | 0.019        | -0.172                              | 0.024        | 0.057                                | 0.059        |
| rs2395943        | 6          | 42940673           | A             | G                | 0.020           | 0.003        | 1.93E-04               | -0.023                    | 0.024        | 0.013                    | 0.032        | -0.067                     | 0.036        | 0.011                     | 0.018        | 0.052                    | 0.035        | 0.020                      | 0.044        | 0.010               | 0.012        | 0.026                               | 0.015        | -0.057                               | 0.035        |
| rs12210538       | 6          | 110760008          | G             | A                | 0.017           | 0.003        | 9.99E-05               | -0.051                    | 0.028        | -0.056                   | 0.038        | -0.048                     | 0.042        | 0.002                     | 0.022        | -0.013                   | 0.043        | 0.067                      | 0.053        | -0.003              | 0.014        | -0.010                              | 0.018        | 0.002                                | 0.042        |
| rs1490384        | 6          | 126851160          | C             | T                | 0.019           | 0.003        | 1.79E-04               | 0.078                     | 0.024        | 0.113                    | 0.032        | 0.036                      | 0.035        | 0.013                     | 0.018        | 0.000                    | 0.035        | -0.004                     | 0.042        | 0.000               | 0.012        | 0.002                               | 0.015        | 0.031                                | 0.035        |
| rs11753995       | 6          | 160575366          | G             | A                | 0.025           | 0.003        | 1.71E-04               | 0.005                     | 0.032        | 0.002                    | 0.044        | 0.012                      | 0.048        | 0.013                     | 0.024        | 0.059                    | 0.047        | 0.118                      | 0.059        | 0.030               | 0.016        | 0.034                               | 0.020        | 0.049                                | 0.048        |
| rs4410790        | 7          | 17284577           | T             | C                | 0.031           | 0.003        | 4.43E-04               | -0.016                    | 0.025        | -0.060                   | 0.034        | 0.037                      | 0.038        | 0.009                     | 0.019        | 0.043                    | 0.036        | 0.032                      |              |                     |              |                                     |              |                                      |              |

**Table S1 | Summary statistics for genetic association of total bilirubin levels and risk of ten cancers**

| SNPs        | Chromosome | Base pair position | Effect allele | Reference allele | Total bilirubin |       |                        | Pancreatic cancer overall |       | Pancreatic cancer in men |       | Pancreatic cancer in women |       | Renal cell cancer overall |       | Renal cell cancer in men |       | Renal cell cancer in women |       | Lung cancer overall |       | Lung cancer overall in ever smokers |       | Lung cancer overall in never smokers |       |
|-------------|------------|--------------------|---------------|------------------|-----------------|-------|------------------------|---------------------------|-------|--------------------------|-------|----------------------------|-------|---------------------------|-------|--------------------------|-------|----------------------------|-------|---------------------|-------|-------------------------------------|-------|--------------------------------------|-------|
|             |            |                    |               |                  | Beta            | SE    | Explained variance (%) | Beta                      | SE    | Beta                     | SE    | Beta                       | SE    | Beta                      | SE    | Beta                     | SE    | Beta                       | SE    | Beta                | SE    | Beta                                | SE    | Beta                                 | SE    |
| rs10761756  | 10         | 65172328           | C             | T                | 0.040           | 0.003 | 7.81E-04               | 0.036                     | 0.024 | 0.064                    | 0.032 | -0.002                     | 0.035 | 0.012                     | 0.018 | -0.047                   | 0.035 | 0.021                      | 0.043 | 0.020               | 0.012 | 0.013                               | 0.015 | 0.015                                | 0.035 |
| rs17476364  | 10         | 71094504           | C             | T                | 0.091           | 0.004 | 1.64E-03               | -0.046                    | 0.041 | -0.119                   | 0.056 | 0.043                      | 0.061 | -0.022                    | 0.032 | 0.004                    | 0.066 | -0.015                     | 0.081 | 0.008               | 0.021 | -0.007                              | 0.026 | 0.015                                | 0.063 |
| rs2901610   | 10         | 94536864           | C             | T                | 0.022           | 0.003 | 2.47E-04               | 0.023                     | 0.024 | 0.044                    | 0.032 | -0.005                     | 0.035 | -0.015                    | 0.018 | -0.033                   | 0.035 | -0.058                     | 0.044 | 0.000               | 0.012 | -0.019                              | 0.015 | 0.030                                | 0.035 |
| rs12768009  | 10         | 96525865           | G             | A                | 0.024           | 0.004 | 1.46E-04               | -0.071                    | 0.034 | -0.025                   | 0.045 | -0.123                     | 0.051 | -0.017                    | 0.026 | 0.001                    | 0.049 | -0.046                     | 0.062 | -0.005              | 0.016 | 0.011                               | 0.021 | -0.068                               | 0.049 |
| rs2792751   | 10         | 113940329          | T             | C                | 0.021           | 0.003 | 1.81E-04               | 0.001                     | 0.026 | 0.003                    | 0.035 | -0.001                     | 0.039 | 0.018                     | 0.020 | -0.007                   | 0.038 | -0.030                     | 0.048 | -0.005              | 0.013 | -0.006                              | 0.016 | -0.043                               | 0.039 |
| rs2245095   | 10         | 122857596          | C             | T                | 0.048           | 0.004 | 3.65E-04               | 0.017                     | 0.040 | 0.047                    | 0.054 | -0.025                     | 0.062 | 0.027                     | 0.031 | -0.012                   | 0.059 | 0.070                      | 0.073 | -0.009              | 0.020 | -0.022                              | 0.025 | 0.018                                | 0.061 |
| rs11601507  | 11         | 5701074            | A             | C                | 0.028           | 0.005 | 1.03E-04               | 0.005                     | 0.046 | 0.010                    | 0.062 | 0.002                      | 0.069 | -0.016                    | 0.036 | -0.105                   | 0.070 | 0.051                      | 0.083 | -0.003              | 0.024 | -0.026                              | 0.030 | -0.013                               | 0.071 |
| rs360139    | 11         | 9775091            | G             | A                | 0.016           | 0.003 | 1.21E-04               | -                         | -     | -                        | -     | -                          | -     | 0.008                     | 0.019 | 0.035                    | 0.038 | -0.038                     | 0.046 | -                   | -     | -                                   | -     | -                                    | -     |
| rs10832027  | 11         | 13357183           | G             | A                | 0.024           | 0.003 | 2.48E-04               | 0.017                     | 0.025 | 0.028                    | 0.034 | 0.006                      | 0.038 | -0.028                    | 0.019 | -0.064                   | 0.037 | 0.075                      | 0.046 | -0.008              | 0.012 | -0.037                              | 0.016 | 0.061                                | 0.037 |
| rs174554    | 11         | 61579463           | A             | G                | 0.021           | 0.003 | 2.02E-04               | 0.000                     | 0.025 | -0.002                   | 0.034 | 0.001                      | 0.038 | 0.028                     | 0.019 | 0.004                    | 0.037 | 0.044                      | 0.046 | 0.032               | 0.012 | 0.046                               | 0.016 | 0.023                                | 0.038 |
| rs499974    | 11         | 75455021           | A             | C                | 0.029           | 0.003 | 2.18E-04               | 0.026                     | 0.031 | 0.041                    | 0.041 | 0.005                      | 0.046 | 0.007                     | 0.024 | 0.051                    | 0.044 | -0.031                     | 0.056 | 0.015               | 0.015 | -0.001                              | 0.019 | 0.080                                | 0.045 |
| rs717662    | 11         | 100493995          | T             | C                | 0.026           | 0.004 | 1.34E-04               | -0.002                    | 0.037 | -0.018                   | 0.050 | 0.010                      | 0.055 | -0.024                    | 0.029 | -0.063                   | 0.054 | -0.073                     | 0.068 | -0.004              | 0.018 | -0.016                              | 0.023 | -0.022                               | 0.054 |
| rs3741298   | 11         | 116657561          | C             | T                | 0.032           | 0.003 | 3.11E-04               | -0.046                    | 0.029 | -0.064                   | 0.040 | -0.027                     | 0.043 | -0.017                    | 0.023 | -0.013                   | 0.044 | 0.037                      | 0.054 | 0.004               | 0.014 | -0.010                              | 0.018 | 0.033                                | 0.043 |
| rs76895963  | 12         | 4384844            | G             | T                | 0.062           | 0.010 | 1.54E-04               | -                         | -     | -                        | -     | -                          | -     | -                         | -     | -                        | -     | -                          | -     | -0.044              | 0.051 | 0.029                               | 0.064 | -0.327                               | 0.146 |
| rs73080739  | 12         | 20761863           | G             | A                | 0.033           | 0.004 | 1.91E-04               | 0.033                     | 0.040 | -0.015                   | 0.054 | 0.090                      | 0.058 | -0.002                    | 0.030 | 0.052                    | 0.057 | 0.031                      | 0.073 | 0.011               | 0.020 | 0.025                               | 0.025 | 0.017                                | 0.060 |
| rs4149056   | 12         | 21331549           | C             | T                | 0.183           | 0.003 | 8.57E-03               | -0.072                    | 0.032 | -0.095                   | 0.043 | -0.045                     | 0.049 | -0.054                    | 0.024 | -0.113                   | 0.045 | -0.033                     | 0.056 | -0.014              | 0.016 | -0.027                              | 0.020 | -0.028                               | 0.047 |
| rs1283809   | 12         | 21980618           | C             | T                | 0.021           | 0.003 | 1.16E-04               | 0.001                     | 0.032 | 0.039                    | 0.043 | -0.046                     | 0.047 | -0.027                    | 0.025 | 0.086                    | 0.049 | -0.022                     | 0.061 | 0.025               | 0.016 | 0.032                               | 0.020 | 0.043                                | 0.046 |
| rs36124182  | 12         | 24214934           | A             | G                | 0.049           | 0.007 | 1.68E-04               | 0.034                     | 0.058 | -0.012                   | 0.080 | 0.085                      | 0.084 | -0.065                    | 0.045 | -0.020                   | 0.088 | 0.069                      | 0.115 | 0.022               | 0.029 | 0.002                               | 0.037 | -0.028                               | 0.083 |
| rs4760682   | 12         | 48512285           | C             | A                | 0.017           | 0.003 | 9.22E-05               | -0.016                    | 0.031 | -0.024                   | 0.042 | -0.009                     | 0.046 | 0.007                     | 0.024 | 0.072                    | 0.048 | -0.016                     | 0.059 | -0.028              | 0.016 | -0.024                              | 0.020 | -0.070                               | 0.048 |
| rs10876376  | 12         | 53261822           | A             | G                | 0.016           | 0.003 | 1.31E-04               | -0.099                    | 0.024 | -0.104                   | 0.032 | -0.095                     | 0.035 | 0.021                     | 0.018 | 0.043                    | 0.035 | -0.025                     | 0.044 | -0.007              | 0.012 | 0.002                               | 0.015 | -0.036                               | 0.035 |
| rs2657879   | 12         | 56865338           | G             | A                | 0.018           | 0.003 | 9.46E-05               | -0.040                    | 0.030 | -0.018                   | 0.041 | -0.064                     | 0.045 | -0.012                    | 0.024 | -0.043                   | 0.047 | -0.044                     | 0.058 | 0.019               | 0.015 | 0.009                               | 0.020 | 0.068                                | 0.045 |
| rs3184504   | 12         | 111884608          | T             | C                | 0.038           | 0.003 | 7.25E-04               | -0.031                    | 0.024 | -0.023                   | 0.032 | -0.041                     | 0.035 | -0.029                    | 0.018 | -0.021                   | 0.035 | -0.081                     | 0.044 | -0.034              | 0.012 | -0.025                              | 0.015 | -0.044                               | 0.035 |
| rs12811045  | 12         | 115527503          | A             | G                | 0.017           | 0.003 | 9.89E-05               | 0.012                     | 0.030 | 0.022                    | 0.040 | -0.005                     | 0.045 | -0.010                    | 0.023 | -0.019                   | 0.047 | -0.065                     | 0.057 | 0.012               | 0.015 | 0.002                               | 0.019 | -0.008                               | 0.044 |
| rs7135337   | 12         | 121404155          | C             | A                | 0.016           | 0.003 | 1.20E-04               | -0.102                    | 0.024 | -0.109                   | 0.032 | -0.092                     | 0.036 | -0.042                    | 0.018 | -0.039                   | 0.035 | -0.065                     | 0.044 | -0.019              | 0.012 | -0.013                              | 0.015 | 0.010                                | 0.035 |
| rs139763750 | 14         | 51049397           | A             | G                | 0.038           | 0.006 | 1.45E-04               | 0.026                     | 0.056 | 0.053                    | 0.076 | -0.002                     | 0.082 | 0.078                     | 0.040 | 0.065                    | 0.077 | 0.146                      | 0.093 | -                   | -     | -                                   | -     | -                                    | -     |
| rs61984409  | 14         | 64730021           | A             | C                | 0.015           | 0.003 | 9.73E-05               | -0.011                    | 0.025 | -0.026                   | 0.033 | 0.007                      | 0.036 | 0.010                     | 0.019 | -0.021                   | 0.037 | 0.000                      | 0.045 | -                   | -     | -                                   | -     | -                                    | -     |
| rs339969    | 15         | 60883281           | C             | A                | 0.026           | 0.003 | 3.20E-04               | 0.004                     | 0.024 | 0.007                    | 0.033 | 0.004                      | 0.036 | 0.009                     | 0.019 | 0.023                    | 0.037 | 0.007                      | 0.045 | -0.013              | 0.012 | -0.022                              | 0.015 | 0.019                                | 0.036 |
| rs17184256  | 15         | 63785421           | G             | A                | 0.022           | 0.003 | 2.14E-04               | 0.041                     | 0.025 | 0.030                    | 0.035 | 0.051                      | 0.038 | 0.023                     | 0.020 | 0.046                    | 0.037 | -0.047                     | 0.047 | -0.025              | 0.013 | -0.031                              | 0.016 | 0.013                                | 0.038 |
| rs67257650  | 15         | 73979507           | T             | C                | 0.017           | 0.003 | 1.42E-04               | -0.024                    | 0.024 | -0.031                   | 0.033 | -0.012                     | 0.036 | 0.001                     | 0.019 | 0.032                    | 0.035 | -0.018                     | 0.045 | 0.016               | 0.012 | 0.006                               | 0.015 | 0.018                                | 0.036 |
| rs181207    | 16         | 28513530           | C             | T                | 0.020           | 0.003 | 1.76E-04               | 0.002                     | 0.026 | 0.014                    | 0.034 | -0.013                     | 0.039 | -0.035                    | 0.020 | -0.013                   | 0.040 | -0.107                     | 0.050 | -0.028              | 0.013 | -0.033                              | 0.017 | 0.020                                | 0.040 |
| rs4575545   | 16         | 79755446           | G             | A                | 0.017           | 0.003 | 1.22E-04               | -0.008                    | 0.026 | -0.007                   | 0.035 | -0.008                     | 0.039 | -0.052                    | 0.020 | -0.098                   | 0.038 | -0.177                     | 0.047 | -0.013              | 0.013 | -0.030                              | 0.016 | 0.025                                | 0.038 |
| rs7185774   | 16         | 81249927           | C             | T                | 0.015           | 0.003 | 9.57E-05               | 0.003                     | 0.025 | 0.045                    | 0.034 | -0.046                     | 0.037 | -0.019                    | 0.019 | -0.038                   | 0.036 | -0.075                     | 0.045 | 0.005               | 0.012 | 0.007                               | 0.015 | -0.063                               | 0.036 |
| rs247827    | 16         | 84582825           | G             | A                | 0.019           | 0.003 | 1.10E-04               | 0.013                     | 0.031 | 0.018                    | 0.042 | 0.005                      | 0.046 | 0.068                     | 0.024 | 0.068                    | 0.048 | 0.041                      | 0.059 | 0.008               | 0.016 | 0.011                               | 0.020 | 0.035                                | 0.047 |
| rs2968478   | 16         | 88858646           | T             | G                | 0.023           | 0.003 | 2.60E-04               | -0.037                    | 0.025 | -0.013                   | 0.033 | -0.064                     | 0.037 | -0.031                    | 0.019 | -0.033                   | 0.036 | -0.081                     | 0.045 | 0.001               | 0.012 | 0.006                               | 0.016 | 0.004                                | 0.037 |
| rs7222046   | 17         | 7806529            | G             | A                | 0.017           | 0.003 | 1.34E-04               | -0.019                    | 0.024 | -0.008                   | 0.032 | -0.034                     | 0.036 | -0.026                    | 0.018 | -0.007                   | 0.035 | 0.005                      | 0.043 | -0.006              | 0.012 | 0.016                               | 0.015 | -0.037                               | 0.035 |
| rs1045599   | 17         | 15879910           | C             | T                | 0.016           | 0.003 | 1.24E-04               | 0.018                     | 0.024 | 0.018                    | 0.032 | 0.015                      | 0.036 | 0.007                     | 0.018 | -0.004                   | 0.035 | 0.019                      | 0.044 | 0.000               | 0.012 | -0.007                              | 0.015 | 0.039                                | 0.036 |
| rs7213285   | 17         | 27206029           | A             | G                | 0.020           | 0.003 | 1.07E-04               | 0.080                     | 0.032 | 0.068                    | 0.044 | 0.099                      | 0.049 | 0.005                     | 0.025 | -0.011                   | 0.048 | -0.007                     | 0.058 | -0.010              | 0.016 | -0.024                              | 0.020 | 0.074                                | 0.047 |
| rs1477141   | 17         | 53361838           | G             | T                | 0.014           | 0.003 | 1.03E-04               | 0.003                     | 0.024 | 0.002                    | 0.032 | 0.004                      | 0.035 | -0.047                    | 0.018 | -0.059                   | 0.034 | -0.112                     | 0.044 | 0.003               | 0.012 | -0.006                              | 0.015 | 0.031                                | 0.038 |
| rs764424    | 17         | 57505604           | G             | A                | 0.015           | 0.003 | 1.12E-04               | -0.016                    | 0.024 | -0.053                   | 0.032 | 0.027                      | 0.035 | 0.023                     | 0.018 | -0.006                   | 0.034 | 0.055                      | 0.043 | 0.013               | 0.012 | 0.020                               | 0.015 | 0.001                                | 0.035 |
| rs11079420  | 17         | 59253051           | A             | G                | 0.020           | 0.003 | 1.33E-04               | 0.093                     | 0.029 | 0.098                    | 0.039 | 0.087                      | 0.043 | 0.009                     | 0.022 | -0.014                   | 0.043 | 0.039                      | 0.054 | -0.028              | 0.014 | -0.029                              | 0.018 | -0.057                               | 0.041 |
| rs7223257   | 17         | 61787684           | T             | C                | 0.017           | 0.003 | 1.33E-04               | -0.045                    | 0.025 | -0.061                   | 0.034 | -0.028                     | 0.037 | 0.031                     | 0.019 | 0.079                    | 0.037 | 0.048                      | 0.046 | 0.017               | 0.012 | 0.015                               | 0.016 | -0.004                               | 0.038 |
| rs12601919  | 17         | 65825374           | A             | G                | 0.021           | 0.003 | 1.35E-04               | -0.053                    | 0.030 | -0.057                   | 0.040 | -0.048                     | 0.045 | -0.003                    | 0.024 | 0.027                    | 0.046 | -0.061                     | 0.057 | -0.049              | 0.015 | -0.045                              | 0.019 | -0.113                               | 0.044 |
| rs2909210   | 17         | 66456481           | T             | G                | 0.015           | 0.003 | 1.17E-04               | -0.030                    | 0.024 | -0.076                   | 0.032 | 0.021                      | 0.035 | 0.024                     | 0.018 | 0.036                    | 0.035 | 0.039                      | 0.044 | -0.009              | 0.012 | -0.013                              | 0.015 | 0.007                                | 0.035 |
| rs1135688   | 17         | 73827205           | C             | T                | 0.015           | 0.003 | 9.06E-05               | 0.042                     | 0.026 | 0.055                    | 0.035 | 0.024                      | 0.038 | 0.043                     | 0.020 | 0.046                    | 0.038 | 0.081                      | 0.048 | -0.021              | 0.013 | -0.033                              | 0.016 | -0.037                               | 0.038 |
| rs379149    | 17         | 76126586           | C             | T                | 0.027           | 0.004 | 1.54E-04               | 0.037                     | 0.039 | -0.002                   | 0.052 | 0.088                      | 0.058 | -0.039                    | 0.034 | -                        | -     | -                          | -     | -0.050              | 0.024 | -0.060                              | 0.031 | -0.038                               | 0.069 |
| rs112896133 | 19         | 12429782           | G             | A                | 0.078           | 0.011 | 1.55E-04               | 0.047                     | 0.130 | 0.253                    | 0.170 | -0.262                     | 0.205 | 0.043                     | 0.099 | -                        | -     | -                          | -     | -0.048              | 0.059 | -0.073                              | 0.074 | 0.224                                | 0.170 |
| rs12609744  | 19         | 12994140           | T             | C                | 0.016           | 0.003 | 1.10E-04               | -0.013                    | 0.026 | -0.0                     |       |                            |       |                           |       |                          |       |                            |       |                     |       |                                     |       |                                      |       |

Table S1 | Summary statistics for genetic association of total bilirubin levels and risk of ten cancers

| SNPs             | Chromosome | Base pair position | Effect allele | Reference allele | Lung adenocarcinoma |              | Squamous cell lung cancer |              | Small cell Lung cancer |              | Ovarian cancer overall |              | Ovarian serous cancer |              | Breast cancer overall |              | Breast ER positive cancer |              | Breast ER negative cancer |              | Endometrial cancer |              | Prostate cancer |              | Melanoma     |              | Neuroblastoma |              |
|------------------|------------|--------------------|---------------|------------------|---------------------|--------------|---------------------------|--------------|------------------------|--------------|------------------------|--------------|-----------------------|--------------|-----------------------|--------------|---------------------------|--------------|---------------------------|--------------|--------------------|--------------|-----------------|--------------|--------------|--------------|---------------|--------------|
|                  |            |                    |               |                  | Beta                | SE           | Beta                      | SE           | Beta                   | SE           | Beta                   | SE           | Beta                  | SE           | Beta                  | SE           | Beta                      | SE           | Beta                      | SE           | Beta               | SE           | Beta            | SE           | Beta         | SE           | Beta          | SE           |
| rs2375279        | 1          | 25541931           | C             | T                | 0.003               | 0.023        | -0.013                    | 0.027        | 0.011                  | 0.042        | 0.005                  | 0.017        | 0.001                 | 0.019        | -0.005                | 0.010        | -0.003                    | 0.011        | 0.011                     | 0.017        | -0.007             | 0.023        | -0.007          | 0.012        | 0.082        | 0.078        | -0.089        | 0.060        |
| rs17513135       | 1          | 40035686           | C             | T                | 0.008               | 0.019        | -0.005                    | 0.022        | -0.027                 | 0.034        | 0.034                  | 0.014        | 0.038                 | 0.016        | -0.014                | 0.008        | -0.012                    | 0.009        | -0.024                    | 0.014        | -0.035             | 0.019        | -0.020          | 0.010        | -0.008       | 0.065        | -             | -            |
| rs6682423        | 1          | 63171063           | T             | C                | -0.021              | 0.017        | -0.043                    | 0.020        | 0.050                  | 0.031        | 0.016                  | 0.013        | 0.016                 | 0.014        | -0.003                | 0.007        | -0.005                    | 0.008        | 0.007                     | 0.012        | -                  | -            | -0.010          | 0.009        | -            | -            | 0.075         | 0.045        |
| rs1762486        | 1          | 107627697          | A             | G                | 0.000               | 0.017        | -0.013                    | 0.020        | 0.021                  | 0.032        | 0.024                  | 0.013        | 0.024                 | 0.014        | 0.000                 | 0.007        | 0.001                     | 0.008        | -0.018                    | 0.012        | 0.009              | 0.017        | -0.004          | 0.009        | -            | -            | -             | -            |
| rs61812598       | 1          | 154420087          | A             | G                | 0.013               | 0.017        | -0.008                    | 0.019        | -0.011                 | 0.030        | 0.014                  | 0.012        | 0.012                 | 0.013        | -0.007                | 0.006        | -0.012                    | 0.008        | 0.001                     | 0.012        | 0.031              | 0.016        | 0.016           | 0.008        | -0.019       | 0.057        | 0.003         | 0.044        |
| rs857725         | 1          | 158607935          | T             | G                | -0.013              | 0.018        | -0.016                    | 0.021        | -0.055                 | 0.033        | -0.002                 | 0.013        | 0.005                 | 0.015        | -0.003                | 0.007        | 0.004                     | 0.009        | -0.042                    | 0.013        | -                  | -            | -0.021          | 0.009        | -0.004       | 0.062        | -0.058        | 0.049        |
| rs788644         | 1          | 202256962          | G             | T                | -0.026              | 0.016        | -0.006                    | 0.019        | 0.012                  | 0.029        | -                      | -            | -                     | -            | 0.001                 | 0.006        | 0.013                     | 0.008        | -0.031                    | 0.012        | 0.004              | 0.016        | -0.014          | 0.008        | -0.055       | 0.057        | -0.101        | 0.043        |
| rs1874121        | 1          | 220969049          | T             | C                | -0.006              | 0.018        | 0.010                     | 0.021        | 0.011                  | 0.033        | -                      | -            | -                     | -            | -0.012                | 0.007        | -0.018                    | 0.009        | -0.013                    | 0.013        | -0.025             | 0.018        | 0.001           | 0.009        | -            | -            | -             | -            |
| rs556107         | 1          | 234853059          | T             | C                | 0.024               | 0.016        | -0.023                    | 0.019        | 0.002                  | 0.030        | -0.029                 | 0.012        | -0.016                | 0.013        | 0.004                 | 0.007        | 0.009                     | 0.008        | -0.003                    | 0.012        | 0.006              | 0.016        | 0.019           | 0.008        | 0.097        | 0.055        | -0.026        | 0.043        |
| rs13030095       | 2          | 26026598           | A             | G                | 0.000               | 0.018        | 0.026                     | 0.021        | 0.038                  | 0.033        | 0.003                  | 0.013        | -0.011                | 0.015        | -0.004                | 0.007        | -0.002                    | 0.009        | -0.011                    | 0.013        | -0.010             | 0.017        | 0.012           | 0.009        | -0.044       | 0.061        | 0.023         | 0.046        |
| rs2053799        | 2          | 32883197           | G             | A                | 0.028               | 0.017        | 0.018                     | 0.019        | 0.004                  | 0.030        | 0.005                  | 0.012        | -0.007                | 0.013        | 0.013                 | 0.006        | 0.010                     | 0.008        | 0.021                     | 0.012        | -0.020             | 0.016        | -0.010          | 0.008        | -            | -            | -             | -            |
| rs4671605        | 2          | 64887382           | T             | C                | 0.013               | 0.018        | 0.019                     | 0.021        | 0.053                  | 0.034        | -0.013                 | 0.014        | -0.017                | 0.015        | 0.019                 | 0.007        | 0.023                     | 0.009        | 0.022                     | 0.013        | 0.006              | 0.018        | 0.006           | 0.010        | -0.003       | 0.063        | 0.010         | 0.048        |
| rs6734238        | 2          | 113841030          | A             | G                | -0.006              | 0.017        | -0.031                    | 0.019        | -0.041                 | 0.030        | 0.019                  | 0.012        | 0.021                 | 0.013        | 0.005                 | 0.006        | 0.005                     | 0.008        | 0.011                     | 0.012        | -0.038             | 0.016        | -0.022          | 0.008        | 0.083        | 0.057        | -0.017        | 0.044        |
| rs1047891        | 2          | 211540507          | A             | C                | 0.016               | 0.018        | -0.007                    | 0.021        | -0.043                 | 0.033        | 0.010                  | 0.013        | 0.009                 | 0.014        | 0.011                 | 0.007        | 0.001                     | 0.008        | 0.036                     | 0.013        | -0.025             | 0.018        | 0.012           | 0.009        | -            | -            | -             | -            |
| rs6731997        | 2          | 232560411          | G             | A                | -0.001              | 0.020        | -0.001                    | 0.023        | -0.002                 | 0.036        | 0.005                  | 0.015        | 0.003                 | 0.016        | -0.014                | 0.008        | -0.016                    | 0.009        | 0.001                     | 0.014        | -0.032             | 0.020        | 0.010           | 0.010        | 0.001        | 0.069        | 0.059         | 0.053        |
| rs4973588        | 2          | 233834975          | A             | G                | 0.011               | 0.022        | 0.017                     | 0.026        | -0.024                 | 0.041        | -0.010                 | 0.016        | -0.002                | 0.018        | -0.001                | 0.009        | -0.004                    | 0.011        | 0.016                     | 0.016        | 0.031              | 0.022        | 0.008           | 0.012        | -            | -            | -0.091        | 0.061        |
| <b>rs6431625</b> | <b>2</b>   | <b>234637912</b>   | <b>C</b>      | <b>T</b>         | <b>-0.004</b>       | <b>0.017</b> | <b>-0.018</b>             | <b>0.019</b> | <b>-0.031</b>          | <b>0.031</b> | <b>-0.024</b>          | <b>0.012</b> | <b>-0.037</b>         | <b>0.013</b> | <b>0.001</b>          | <b>0.006</b> | <b>0.008</b>              | <b>0.008</b> | <b>-0.020</b>             | <b>0.012</b> | <b>-0.006</b>      | <b>0.016</b> | <b>0.000</b>    | <b>0.008</b> | <b>0.048</b> | <b>0.058</b> | <b>0.029</b>  | <b>0.044</b> |
| rs10929023       | 2          | 235169902          | G             | A                | -0.011              | 0.018        | -0.001                    | 0.021        | 0.050                  | 0.033        | 0.004                  | 0.013        | 0.005                 | 0.015        | 0.003                 | 0.007        | 0.005                     | 0.009        | 0.007                     | 0.014        | -0.027             | 0.018        | 0.004           | 0.010        | 0.084        | 0.058        | 0.044         | 0.047        |
| rs2267846        | 3          | 48556339           | A             | G                | 0.011               | 0.018        | 0.019                     | 0.021        | 0.040                  | 0.034        | -0.033                 | 0.014        | -0.031                | 0.015        | 0.009                 | 0.007        | 0.006                     | 0.009        | 0.018                     | 0.013        | 0.010              | 0.018        | 0.033           | 0.009        | -0.153       | 0.062        | 0.009         | 0.048        |
| rs9826148        | 3          | 114464858          | C             | T                | -0.014              | 0.025        | -0.018                    | 0.030        | 0.025                  | 0.047        | 0.023                  | 0.019        | 0.046                 | 0.021        | 0.007                 | 0.010        | 0.009                     | 0.012        | -0.011                    | 0.018        | -0.022             | 0.025        | 0.010           | 0.013        | 0.049        | 0.090        | -             | -            |
| rs6779903        | 3          | 135720851          | T             | G                | 0.036               | 0.018        | 0.003                     | 0.021        | 0.029                  | 0.033        | -0.016                 | 0.013        | -0.019                | 0.015        | 0.006                 | 0.007        | 0.005                     | 0.008        | 0.013                     | 0.013        | 0.001              | 0.018        | -0.004          | 0.009        | -0.002       | 0.061        | 0.040         | 0.048        |
| rs1052618        | 3          | 136574501          | A             | G                | 0.019               | 0.017        | 0.005                     | 0.020        | 0.022                  | 0.032        | 0.010                  | 0.013        | 0.006                 | 0.014        | 0.013                 | 0.007        | 0.015                     | 0.008        | 0.025                     | 0.012        | -0.029             | 0.017        | -0.018          | 0.009        | -0.052       | 0.059        | 0.017         | 0.047        |
| rs1482852        | 3          | 156798294          | A             | G                | -0.004              | 0.017        | 0.010                     | 0.019        | -0.032                 | 0.031        | 0.033                  | 0.012        | 0.047                 | 0.013        | 0.006                 | 0.006        | 0.005                     | 0.008        | 0.012                     | 0.012        | -0.017             | 0.016        | -0.022          | 0.008        | -            | -            | -0.029        | 0.044        |
| rs61791066       | 3          | 170713380          | C             | T                | -0.005              | 0.023        | -0.017                    | 0.027        | -0.015                 | 0.043        | -0.037                 | 0.017        | -0.036                | 0.019        | 0.016                 | 0.009        | 0.007                     | 0.011        | 0.028                     | 0.016        | -0.003             | 0.023        | -0.024          | 0.012        | 0.034        | 0.082        | 0.031         | 0.063        |
| rs11917973       | 3          | 195838613          | T             | C                | 0.014               | 0.017        | 0.016                     | 0.020        | -0.026                 | 0.031        | 0.003                  | 0.012        | 0.011                 | 0.014        | 0.015                 | 0.007        | 0.018                     | 0.008        | 0.014                     | 0.012        | -0.020             | 0.017        | -0.001          | 0.009        | -            | -            | -             | -            |
| rs13092376       | 3          | 196516288          | C             | A                | -0.023              | 0.017        | -0.026                    | 0.019        | -0.007                 | 0.030        | 0.017                  | 0.012        | 0.019                 | 0.014        | -0.004                | 0.007        | -0.003                    | 0.008        | -0.004                    | 0.012        | -0.035             | 0.016        | 0.004           | 0.008        | -            | -            | -             | -            |
| rs115558925      | 4          | 69765782           | A             | C                | 0.005               | 0.030        | -0.021                    | 0.036        | -0.010                 | 0.057        | 0.007                  | 0.021        | -0.017                | 0.023        | -0.018                | 0.012        | -0.018                    | 0.014        | -0.025                    | 0.021        | 0.017              | 0.029        | 0.018           | 0.015        | -            | -            | -             | -            |
| rs151450         | 4          | 88016514           | G             | A                | -0.006              | 0.016        | -0.037                    | 0.019        | -0.017                 | 0.030        | 0.009                  | 0.012        | 0.007                 | 0.013        | -0.013                | 0.006        | -0.016                    | 0.008        | -0.009                    | 0.012        | 0.022              | 0.016        | -0.012          | 0.008        | -            | -            | -             | -            |
| rs1126673        | 4          | 100045616          | C             | T                | 0.000               | 0.017        | 0.031                     | 0.020        | 0.011                  | 0.032        | -0.017                 | 0.013        | -0.019                | 0.014        | -0.012                | 0.007        | -0.017                    | 0.008        | 0.007                     | 0.012        | -0.016             | 0.017        | -0.004          | 0.009        | 0.052        | 0.059        | 0.034         | 0.046        |
| rs79800919       | 4          | 124787383          | G             | A                | 0.053               | 0.025        | 0.033                     | 0.029        | -0.018                 | 0.045        | 0.002                  | 0.018        | -0.001                | 0.020        | 0.013                 | 0.010        | 0.019                     | 0.012        | 0.011                     | 0.018        | -0.027             | 0.025        | 0.027           | 0.013        | 0.044        | 0.086        | -             | -            |
| rs11727331       | 4          | 145091680          | A             | G                | -                   | -            | -                         | -            | -                      | -            | 0.008                  | 0.027        | 0.012                 | 0.030        | -                     | -            | -                         | -            | -                         | -            | 0.020              | 0.037        | 0.023           | 0.018        | -            | -            | -             | -            |
| rs10003923       | 4          | 175086079          | C             | T                | 0.025               | 0.017        | 0.000                     | 0.020        | 0.029                  | 0.031        | 0.006                  | 0.013        | 0.006                 | 0.014        | 0.007                 | 0.007        | 0.013                     | 0.008        | -0.006                    | 0.012        | -0.004             | 0.017        | -0.001          | 0.009        | -0.050       | 0.055        | -             | -            |
| rs6869704        | 5          | 122833667          | T             | C                | 0.009               | 0.016        | 0.021                     | 0.019        | -0.050                 | 0.030        | 0.005                  | 0.012        | 0.007                 | 0.013        | 0.005                 | 0.006        | 0.006                     | 0.007        | 0.011                     | 0.011        | -0.026             | 0.016        | 0.007           | 0.008        | 0.100        | 0.055        | -0.009        | 0.043        |
| rs274555         | 5          | 131722951          | C             | T                | 0.027               | 0.016        | 0.035                     | 0.019        | 0.063                  | 0.030        | 0.012                  | 0.012        | 0.021                 | 0.013        | 0.024                 | 0.006        | 0.026                     | 0.007        | -0.003                    | 0.012        | -0.009             | 0.016        | -               | -            | -0.039       | 0.056        | -             | -            |
| rs12515233       | 5          | 158417109          | C             | A                | -0.030              | 0.021        | 0.002                     | 0.025        | 0.046                  | 0.039        | -0.020                 | 0.015        | -0.028                | 0.017        | 0.044                 | 0.008        | 0.046                     | 0.010        | 0.051                     | 0.015        | 0.033              | 0.021        | 0.005           | 0.010        | 0.102        | 0.074        | -             | -            |
| rs72835688       | 6          | 12811955           | C             | T                | -                   | -            | -                         | -            | -                      | -            | 0.004                  | 0.029        | 0.012                 | 0.032        | -0.016                | 0.016        | -0.020                    | 0.019        | -0.004                    | 0.029        | 0.054              | 0.040        | 0.017           | 0.020        | -            | -            | -             | -            |
| rs9379764        | 6          | 25414023           | G             | T                | 0.049               | 0.019        | -0.010                    | 0.022        | -0.014                 | 0.035        | -0.013                 | 0.014        | -0.017                | 0.015        | 0.009                 | 0.007        | 0.009                     | 0.009        | 0.001                     | 0.014        | -0.001             | 0.019        | 0.013           | 0.010        | -            | -            | -             | -            |
| rs198851         | 6          | 26104632           | T             | G                | -0.025              | 0.023        | -0.014                    | 0.026        | 0.000                  | 0.041        | -0.001                 | 0.016        | 0.004                 | 0.018        | 0.000                 | 0.009        | -0.002                    | 0.011        | -0.012                    | 0.016        | 0.052              | 0.022        | -0.033          | 0.011        | -0.070       | 0.075        | -0.036        | 0.062        |
| rs200484         | 6          | 27775674           | A             | G                | -0.040              | 0.027        | -0.188                    | 0.031        | -0.130                 | 0.049        | 0.011                  | 0.019        | -0.001                | 0.021        | 0.045                 | 0.011        | 0.051                     | 0.013        | 0.036                     | 0.020        | -                  | -            | 0.042           | 0.013        | -0.139       | 0.132        | 0.045         | 0.069        |
| rs853684         | 6          | 28294550           | T             | C                | -0.001              | 0.017        | -0.058                    | 0.019        | -0.026                 | 0.031        | 0.036                  | 0.012        | 0.033                 | 0.014        | -0.009                | 0.007        | -0.006                    | 0.008        | -0.021                    | 0.012        | 0.012              | 0.016        | 0.006           | 0.008        | -0.042       | 0.067        | 0.067         | 0.044        |
| rs9267488        | 6          | 31514247           | A             | G                | -0.091              | 0.027        | -0.230                    | 0.030        | -0.198                 | 0.048        | -0.019                 | 0.019        | -0.028                | 0.021        | 0.025                 | 0.010        | 0.027                     | 0.013        | -0.002                    | 0.019        | 0.109              | 0.025        | 0.055           | 0.013        | -            | -            | -             | -            |
| rs2395943        | 6          | 42940673           | A             | G                | 0.014               | 0.016        | -0.003                    | 0.019        | 0.006                  | 0.030        | 0.004                  | 0.012        | 0.006                 | 0.013        | 0.011                 | 0.006        | 0.021                     | 0.008        | -0.005                    | 0.011        | -0.027             | 0.016        | -0.028          | 0.008        | -0.008       | 0.057        | -0.025        | 0.044        |
| rs12210538       | 6          | 110760008          | G             | A                | -0.003              | 0.019        | -0.005                    | 0.022        | -0.007                 | 0.036        | 0.029                  | 0.014        | 0.020                 | 0.015        | -0.008                | 0.007        | -                         |              |                           |              |                    |              |                 |              |              |              |               |              |

**Table S1 | Summary statistics for genetic association of total bilirubin levels and risk of ten cancers**

| SNPs        | Chromosome | Base pair position | Effect allele | Reference allele | Lung adenocarcinoma |       | Squamous cell lung cancer |       | Small cell Lung cancer |       | Ovarian cancer overall |       | Ovarian serous cancer |       | Breast cancer overall |       | Breast ER positive cancer |       | Breast ER negative cancer |       | Endometrial cancer |       | Prostate cancer |       | Melanoma |       | Neuroblastoma |       |
|-------------|------------|--------------------|---------------|------------------|---------------------|-------|---------------------------|-------|------------------------|-------|------------------------|-------|-----------------------|-------|-----------------------|-------|---------------------------|-------|---------------------------|-------|--------------------|-------|-----------------|-------|----------|-------|---------------|-------|
|             |            |                    |               |                  | Beta                | SE    | Beta                      | SE    | Beta                   | SE    | Beta                   | SE    | Beta                  | SE    | Beta                  | SE    | Beta                      | SE    | Beta                      | SE    | Beta               | SE    | Beta            | SE    | Beta     | SE    | Beta          | SE    |
| rs10761756  | 10         | 65172328           | C             | T                | 0.009               | 0.016 | 0.020                     | 0.019 | 0.038                  | 0.030 | -0.007                 | 0.012 | -0.003                | 0.013 | 0.021                 | 0.006 | 0.028                     | 0.008 | 0.002                     | 0.012 | 0.012              | 0.016 | 0.000           | 0.008 | -0.022   | 0.055 | 0.055         | 0.043 |
| rs17476364  | 10         | 71094504           | C             | T                | 0.004               | 0.028 | -0.001                    | 0.033 | -0.013                 | 0.053 | -0.016                 | 0.021 | -0.025                | 0.023 | 0.009                 | 0.011 | 0.012                     | 0.013 | 0.018                     | 0.020 | -0.035             | 0.027 | 0.011           | 0.014 | -        | -     | -             | -     |
| rs2901610   | 10         | 94536864           | C             | T                | -0.004              | 0.016 | 0.007                     | 0.019 | 0.005                  | 0.030 | -0.009                 | 0.012 | -0.007                | 0.013 | -0.008                | 0.006 | -0.014                    | 0.008 | -0.005                    | 0.012 | 0.008              | 0.016 | 0.005           | 0.008 | -        | -     | -0.053        | 0.043 |
| rs12768009  | 10         | 96525865           | G             | A                | -0.001              | 0.023 | 0.003                     | 0.026 | 0.063                  | 0.042 | 0.039                  | 0.017 | 0.040                 | 0.019 | 0.002                 | 0.009 | -0.004                    | 0.010 | 0.016                     | 0.016 | 0.001              | 0.022 | -0.022          | 0.011 | 0.005    | 0.078 | -0.126        | 0.062 |
| rs2792751   | 10         | 113940329          | T             | C                | -0.005              | 0.018 | -0.007                    | 0.020 | 0.007                  | 0.032 | 0.010                  | 0.013 | 0.016                 | 0.014 | -0.013                | 0.007 | -0.015                    | 0.008 | -0.008                    | 0.013 | 0.012              | 0.018 | 0.015           | 0.009 | 0.016    | 0.061 | 0.074         | 0.047 |
| rs2245095   | 10         | 122857596          | C             | T                | 0.003               | 0.028 | 0.020                     | 0.032 | 0.001                  | 0.050 | 0.023                  | 0.020 | 0.035                 | 0.023 | 0.032                 | 0.011 | 0.030                     | 0.013 | 0.001                     | 0.019 | -0.005             | 0.027 | -0.003          | 0.014 | 0.037    | 0.095 | -0.070        | 0.075 |
| rs11601507  | 11         | 5701074            | A             | C                | 0.021               | 0.033 | -0.037                    | 0.039 | 0.018                  | 0.061 | -0.065                 | 0.025 | -0.074                | 0.028 | 0.003                 | 0.013 | 0.018                     | 0.016 | 0.016                     | 0.024 | 0.016              | 0.034 | -0.068          | 0.017 | -0.145   | 0.107 | -             | -     |
| rs360139    | 11         | 9775091            | G             | A                | -                   | -     | -                         | -     | -                      | -     | -0.006                 | 0.012 | 0.000                 | 0.014 | -0.021                | 0.007 | -0.021                    | 0.008 | -0.031                    | 0.012 | -0.004             | 0.017 | -0.019          | 0.009 | 0.039    | 0.060 | 0.004         | 0.045 |
| rs10832027  | 11         | 13357183           | G             | A                | -0.008              | 0.017 | -0.026                    | 0.020 | 0.012                  | 0.031 | -0.026                 | 0.012 | -0.025                | 0.014 | 0.002                 | 0.007 | 0.000                     | 0.008 | 0.011                     | 0.012 | -0.003             | 0.017 | -0.014          | 0.009 | 0.042    | 0.060 | 0.052         | 0.046 |
| rs174554    | 11         | 61579463           | A             | G                | 0.035               | 0.017 | 0.039                     | 0.020 | 0.026                  | 0.031 | -0.014                 | 0.012 | -0.008                | 0.014 | 0.008                 | 0.007 | 0.000                     | 0.008 | 0.031                     | 0.012 | -0.021             | 0.017 | 0.002           | 0.009 | 0.029    | 0.059 | -0.010        | 0.048 |
| rs499974    | 11         | 75455021           | A             | C                | 0.032               | 0.021 | -0.022                    | 0.024 | 0.013                  | 0.038 | 0.030                  | 0.015 | 0.027                 | 0.017 | -0.012                | 0.008 | -0.027                    | 0.010 | 0.042                     | 0.015 | -0.031             | 0.021 | 0.000           | 0.010 | 0.002    | 0.074 | 0.088         | 0.057 |
| rs717662    | 11         | 100493995          | T             | C                | -0.022              | 0.025 | 0.010                     | 0.029 | -0.059                 | 0.047 | 0.016                  | 0.019 | 0.006                 | 0.021 | -0.014                | 0.010 | -0.037                    | 0.012 | 0.040                     | 0.018 | 0.032              | 0.025 | 0.016           | 0.013 | -        | -     | -0.149        | 0.066 |
| rs3741298   | 11         | 116657561          | C             | T                | 0.006               | 0.020 | 0.030                     | 0.023 | -0.072                 | 0.036 | 0.002                  | 0.015 | 0.007                 | 0.016 | -0.017                | 0.008 | -0.027                    | 0.009 | -0.013                    | 0.014 | -0.001             | 0.020 | -0.009          | 0.010 | -0.086   | 0.067 | -             | -     |
| rs76895963  | 12         | 4384844            | G             | T                | -0.072              | 0.068 | -0.021                    | 0.081 | 0.094                  | 0.120 | 0.016                  | 0.044 | 0.032                 | 0.049 | 0.001                 | 0.026 | -0.005                    | 0.030 | 0.015                     | 0.048 | -0.131             | 0.065 | 0.038           | 0.032 | -        | -     | -             | -     |
| rs73080739  | 12         | 20761863           | G             | A                | -0.009              | 0.027 | 0.025                     | 0.032 | 0.074                  | 0.050 | 0.019                  | 0.020 | 0.027                 | 0.022 | -0.004                | 0.010 | -0.017                    | 0.012 | 0.015                     | 0.019 | -0.021             | 0.026 | -               | -     | -0.043   | 0.098 | -             | -     |
| rs4149056   | 12         | 21331549           | C             | T                | -0.020              | 0.022 | 0.002                     | 0.025 | -0.057                 | 0.040 | 0.032                  | 0.016 | 0.036                 | 0.018 | 0.010                 | 0.008 | 0.012                     | 0.010 | 0.013                     | 0.015 | 0.079              | 0.021 | -0.004          | 0.011 | -0.019   | 0.076 | -             | -     |
| rs1283809   | 12         | 21980618           | C             | T                | 0.035               | 0.022 | 0.037                     | 0.026 | 0.002                  | 0.041 | 0.038                  | 0.016 | 0.028                 | 0.018 | -0.002                | 0.009 | 0.004                     | 0.010 | -0.012                    | 0.016 | -                  | -     | -               | -     | -0.037   | 0.073 | -             | -     |
| rs36124182  | 12         | 24214934           | A             | G                | 0.025               | 0.039 | -0.042                    | 0.046 | 0.044                  | 0.075 | 0.042                  | 0.030 | 0.033                 | 0.033 | 0.014                 | 0.017 | 0.017                     | 0.020 | 0.015                     | 0.030 | 0.003              | 0.042 | -               | -     | -        | -     | -             | -     |
| rs4760682   | 12         | 48512285           | C             | A                | -0.014              | 0.022 | -0.051                    | 0.026 | -0.018                 | 0.041 | 0.004                  | 0.016 | -0.001                | 0.018 | -0.006                | 0.008 | -0.008                    | 0.010 | -                         | -     | -0.014             | 0.021 | -               | -     | -        | -     | -             | -     |
| rs10876376  | 12         | 53261822           | A             | G                | -0.003              | 0.016 | 0.001                     | 0.019 | 0.004                  | 0.030 | -0.003                 | 0.012 | 0.008                 | 0.013 | 0.005                 | 0.006 | -0.005                    | 0.007 | 0.021                     | 0.011 | 0.002              | 0.016 | -0.019          | 0.008 | -0.092   | 0.056 | 0.028         | 0.043 |
| rs2657879   | 12         | 56865338           | G             | A                | 0.020               | 0.021 | -0.002                    | 0.025 | -0.013                 | 0.039 | -0.034                 | 0.015 | -0.038                | 0.017 | 0.006                 | 0.009 | 0.001                     | 0.010 | 0.031                     | 0.016 | 0.024              | 0.021 | -               | -     | -0.024   | 0.072 | -             | -     |
| rs3184504   | 12         | 111884608          | T             | C                | -0.034              | 0.016 | -0.034                    | 0.019 | -0.053                 | 0.030 | -0.007                 | 0.012 | -0.002                | 0.013 | -0.031                | 0.006 | -0.030                    | 0.007 | -0.033                    | 0.011 | -0.099             | 0.016 | -0.019          | 0.008 | 0.047    | 0.055 | 0.060         | 0.043 |
| rs12811045  | 12         | 115527503          | A             | G                | 0.000               | 0.021 | 0.015                     | 0.024 | -0.021                 | 0.038 | 0.002                  | 0.014 | 0.010                 | 0.016 | 0.002                 | 0.008 | -0.004                    | 0.009 | 0.017                     | 0.014 | 0.006              | 0.020 | 0.008           | 0.010 | 0.086    | 0.069 | -             | -     |
| rs7135337   | 12         | 121404155          | C             | A                | -0.023              | 0.016 | 0.019                     | 0.019 | -0.026                 | 0.030 | -0.065                 | 0.012 | -0.080                | 0.013 | 0.017                 | 0.006 | 0.009                     | 0.008 | 0.032                     | 0.011 | 0.001              | 0.016 | -0.013          | 0.008 | 0.084    | 0.057 | -0.061        | 0.044 |
| rs139763750 | 14         | 51049397           | A             | G                | -                   | -     | -                         | -     | -                      | -     | 0.013                  | 0.027 | 0.002                 | 0.031 | -0.022                | 0.015 | -0.035                    | 0.018 | -0.042                    | 0.027 | -0.031             | 0.036 | -0.001          | 0.020 | -        | -     | -             | -     |
| rs61984409  | 14         | 64730021           | A             | C                | -                   | -     | -                         | -     | -                      | -     | 0.020                  | 0.012 | 0.009                 | 0.014 | -0.014                | 0.006 | -0.014                    | 0.008 | -0.023                    | 0.012 | -0.003             | 0.016 | -0.023          | 0.008 | -        | -     | -             | -     |
| rs339969    | 15         | 60883281           | C             | A                | 0.008               | 0.017 | -0.034                    | 0.019 | 0.004                  | 0.031 | 0.035                  | 0.012 | 0.045                 | 0.014 | -0.010                | 0.007 | -0.007                    | 0.008 | -0.013                    | 0.012 | -0.011             | 0.016 | -0.006          | 0.008 | -0.051   | 0.057 | 0.024         | 0.044 |
| rs17184256  | 15         | 63785421           | G             | A                | -0.015              | 0.017 | -0.049                    | 0.020 | -0.102                 | 0.032 | 0.007                  | 0.013 | -0.005                | 0.014 | 0.004                 | 0.007 | 0.008                     | 0.008 | -0.017                    | 0.012 | 0.050              | 0.017 | 0.006           | 0.009 | -        | -     | -             | -     |
| rs67257650  | 15         | 73979507           | T             | C                | 0.019               | 0.016 | 0.036                     | 0.019 | 0.033                  | 0.030 | -0.006                 | 0.012 | -0.004                | 0.013 | -0.003                | 0.006 | 0.002                     | 0.008 | -0.009                    | 0.012 | 0.020              | 0.016 | 0.008           | 0.008 | 0.099    | 0.056 | 0.034         | 0.043 |
| rs181207    | 16         | 28513530           | C             | T                | -0.008              | 0.018 | -0.043                    | 0.021 | -0.053                 | 0.034 | -0.005                 | 0.013 | 0.013                 | 0.015 | -0.002                | 0.007 | -0.010                    | 0.009 | 0.008                     | 0.013 | -0.034             | 0.018 | -0.003          | 0.009 | -0.083   | 0.059 | -             | -     |
| rs4575545   | 16         | 79755446           | G             | A                | -0.028              | 0.018 | -0.012                    | 0.021 | 0.026                  | 0.032 | 0.016                  | 0.013 | 0.015                 | 0.014 | 0.001                 | 0.007 | -0.002                    | 0.008 | 0.016                     | 0.012 | -0.019             | 0.017 | 0.007           | 0.009 | 0.110    | 0.059 | -             | -     |
| rs7185774   | 16         | 81249927           | C             | T                | -0.014              | 0.017 | 0.020                     | 0.019 | 0.004                  | 0.031 | -0.004                 | 0.012 | -0.012                | 0.014 | -0.002                | 0.007 | -0.001                    | 0.008 | 0.000                     | 0.012 | 0.011              | 0.017 | 0.000           | 0.009 | -0.079   | 0.059 | -0.100        | 0.045 |
| rs247827    | 16         | 84582825           | G             | A                | 0.004               | 0.022 | 0.023                     | 0.025 | 0.059                  | 0.040 | -0.014                 | 0.016 | -0.017                | 0.017 | 0.009                 | 0.008 | 0.003                     | 0.010 | 0.018                     | 0.015 | 0.023              | 0.021 | -0.024          | 0.011 | -        | -     | -             | -     |
| rs2968478   | 16         | 88858646           | T             | G                | 0.001               | 0.017 | 0.023                     | 0.020 | -0.039                 | 0.031 | 0.016                  | 0.012 | 0.015                 | 0.014 | -0.009                | 0.007 | -0.007                    | 0.008 | -0.013                    | 0.012 | -0.003             | 0.017 | -0.009          | 0.009 | -        | -     | -             | -     |
| rs7222046   | 17         | 7806529            | G             | A                | -0.016              | 0.016 | 0.024                     | 0.019 | -0.002                 | 0.030 | 0.010                  | 0.012 | 0.008                 | 0.014 | 0.019                 | 0.007 | 0.021                     | 0.008 | 0.020                     | 0.012 | -0.008             | 0.017 | 0.030           | 0.009 | 0.000    | 0.056 | 0.042         | 0.044 |
| rs1045599   | 17         | 15879910           | C             | T                | -0.003              | 0.016 | -0.030                    | 0.019 | -0.032                 | 0.030 | -0.009                 | 0.012 | -0.018                | 0.014 | -0.003                | 0.006 | -0.006                    | 0.008 | 0.004                     | 0.012 | -0.024             | 0.016 | -0.007          | 0.008 | 0.002    | 0.056 | -0.017        | 0.044 |
| rs7213285   | 17         | 27206029           | A             | G                | -0.019              | 0.022 | 0.008                     | 0.026 | -0.012                 | 0.041 | -0.015                 | 0.016 | -0.017                | 0.018 | 0.007                 | 0.009 | 0.001                     | 0.010 | 0.009                     | 0.016 | 0.002              | 0.022 | 0.007           | 0.011 | -        | -     | -             | -     |
| rs1477141   | 17         | 53361838           | G             | T                | 0.017               | 0.017 | -0.019                    | 0.019 | -0.011                 | 0.031 | 0.011                  | 0.013 | 0.025                 | 0.014 | 0.010                 | 0.007 | 0.005                     | 0.008 | 0.013                     | 0.012 | 0.028              | 0.017 | 0.006           | 0.009 | 0.013    | 0.055 | -             | -     |
| rs764424    | 17         | 57505604           | G             | A                | 0.024               | 0.016 | 0.000                     | 0.019 | -0.010                 | 0.030 | -0.007                 | 0.012 | -0.009                | 0.013 | 0.008                 | 0.006 | 0.013                     | 0.007 | 0.002                     | 0.011 | 0.000              | 0.016 | 0.013           | 0.008 | -0.077   | 0.056 | -0.015        | 0.043 |
| rs11079420  | 17         | 59253051           | A             | G                | -0.037              | 0.019 | -0.034                    | 0.023 | -0.041                 | 0.035 | 0.029                  | 0.014 | 0.041                 | 0.016 | 0.003                 | 0.008 | 0.012                     | 0.009 | -0.017                    | 0.014 | -0.016             | 0.019 | 0.023           | 0.010 | -0.006   | 0.067 | 0.046         | 0.053 |
| rs7223257   | 17         | 61787684           | T             | C                | 0.037               | 0.017 | -0.022                    | 0.020 | 0.071                  | 0.032 | -0.008                 | 0.012 | -0.008                | 0.014 | 0.009                 | 0.007 | 0.004                     | 0.008 | 0.001                     | 0.012 | -0.016             | 0.017 | -0.024          | 0.008 | -0.066   | 0.060 | -0.053        | 0.046 |
| rs12601919  | 17         | 65825374           | A             | G                | -0.052              | 0.021 | -0.042                    | 0.024 | -0.152                 | 0.037 | 0.023                  | 0.015 | 0.034                 | 0.016 | -0.002                | 0.008 | 0.002                     | 0.009 | -0.025                    | 0.014 | -0.088             | 0.020 | 0.027           | 0.010 | -0.055   | 0.068 | 0.046         | 0.054 |
| rs2909210   | 17         | 66456481           | T             | G                | -0.013              | 0.016 | -0.027                    | 0.019 | 0.020                  | 0.030 | 0.014                  | 0.012 | 0.026                 | 0.013 | 0.004                 | 0.006 | -0.005                    | 0.008 | 0.025                     | 0.012 | -0.015             | 0.016 | 0.013           | 0     |          |       |               |       |

**Table S2 | Results of sensitivity Mendelian randomization methods for total bilirubin levels and risk of ten cancers**

| Cancer outcome    | Subtype             | SNP set             | n SNP | Likelihood-based method |      |      |         | Inverse-variance weighted method |      |      |      | Weigthed median approach |      |      |      | Modal-based method |      |      |      | MR-Egger Simex approach |      |      |       | MR-Egger intercept approach |         |         |       | MR-PRESSO approach |          |              |                      |  |  |  |  |
|-------------------|---------------------|---------------------|-------|-------------------------|------|------|---------|----------------------------------|------|------|------|--------------------------|------|------|------|--------------------|------|------|------|-------------------------|------|------|-------|-----------------------------|---------|---------|-------|--------------------|----------|--------------|----------------------|--|--|--|--|
|                   |                     |                     |       | OR                      | LCI  | UCI  | P       | Phet                             | OR   | LCI  | UCI  | P                        | OR   | LCI  | UCI  | P                  | OR   | LCI  | UCI  | P                       | OR   | LCI  | UCI   | P                           | Est     | LCI     | UCI   | P                  | P Global | P Distortion | Outlier SNPs         |  |  |  |  |
| Pancreatic cancer | overall             | UGT1A1 SNP          | 1     | 1.02                    | 0.95 | 1.11 | 0.56    |                                  |      |      |      |                          |      |      |      |                    |      |      |      |                         |      |      |       |                             |         |         |       |                    |          |              |                      |  |  |  |  |
|                   |                     | Non-UGT1A1 SNPs     | 113   | 0.74                    | 0.61 | 0.89 | 1.7E-03 | 3.0E-08                          | 0.74 | 0.61 | 0.90 | 2.E-03                   | 0.68 | 0.49 | 0.95 | 0.02               | 0.69 | 0.51 | 0.94 | 0.02                    | 0.69 | 0.43 | 1.10  | 0.12                        | 0.002   | -0.007  | 0.011 | 0.63               | <1e-04   | 0.28         | rs10876376,rs2519093 |  |  |  |  |
|                   |                     | Pleiotropy out SNPs | 91    | 0.85                    | 0.66 | 1.11 | 0.23    | 2.2E-03                          | 0.85 | 0.66 | 1.11 | 0.23                     | 0.96 | 0.63 | 1.45 | 0.84               | 1.02 | 0.50 | 2.09 | 0.95                    | 1.05 | 0.41 | 2.664 | 0.92                        | -0.005  | -0.021  | 0.010 | 0.51               | 2.1E-03  | 0.23         | rs10876376,rs7135337 |  |  |  |  |
|                   | men                 | UGT1A1 SNP          | 1     | 1.06                    | 0.95 | 1.18 | 0.27    |                                  |      |      |      |                          |      |      |      |                    |      |      |      |                         |      |      |       |                             |         |         |       |                    |          |              |                      |  |  |  |  |
|                   |                     | Non-UGT1A1 SNPs     | 113   | 0.75                    | 0.58 | 0.96 | 0.02    | 2.5E-03                          | 0.75 | 0.58 | 0.97 | 0.03                     | 0.60 | 0.39 | 0.93 | 0.02               | 0.60 | 0.39 | 0.92 | 0.02                    | 0.60 | 0.35 | 1.05  | 0.07                        | 0.007   | -0.005  | 0.019 | 0.27               | 2.2E-03  | 0.72         | rs2519093            |  |  |  |  |
|                   |                     | Pleiotropy out SNPs | 91    | 0.89                    | 0.63 | 1.27 | 0.53    | 0.11                             | 0.89 | 0.63 | 1.26 | 0.51                     | 0.96 | 0.56 | 1.64 | 0.89               | 1.18 | 0.26 | 5.26 | 0.83                    | 0.89 | 0.29 | 2.73  | 0.83                        | 6.9E-06 | -0.021  | 0.021 | 1.00               | 0.10     | -            | -                    |  |  |  |  |
|                   | women               | UGT1A1 SNP          | 1     | 0.98                    | 0.87 | 1.10 | 0.71    |                                  |      |      |      |                          |      |      |      |                    |      |      |      |                         |      |      |       |                             |         |         |       |                    |          |              |                      |  |  |  |  |
|                   |                     | Non-UGT1A1 SNPs     | 113   | 0.73                    | 0.55 | 0.97 | 0.03    | 0.01                             | 0.73 | 0.55 | 0.97 | 0.03                     | 0.78 | 0.49 | 1.26 | 0.32               | 0.81 | 0.51 | 1.29 | 0.38                    | 0.81 | 0.44 | 1.49  | 0.49                        | -0.004  | -0.017  | 0.010 | 0.60               | 0.01     | 0.57         | rs2519093            |  |  |  |  |
|                   |                     | Pleiotropy out SNPs | 91    | 0.81                    | 0.55 | 1.20 | 0.29    | 0.11                             | 0.81 | 0.55 | 1.19 | 0.29                     | 0.96 | 0.52 | 1.76 | 0.90               | 0.93 | 0.36 | 2.42 | 0.89                    | 1.44 | 0.42 | 4.97  | 0.56                        | -0.013  | -0.036  | 0.011 | 0.29               | 0.11     | -            | -                    |  |  |  |  |
| Renal cell cancer | overall             | UGT1A1 SNP          | 1     | 1.01                    | 0.95 | 1.07 | 0.78    |                                  |      |      |      |                          |      |      |      |                    |      |      |      |                         |      |      |       |                             |         |         |       |                    |          |              |                      |  |  |  |  |
|                   |                     | Non-UGT1A1 SNPs     | 111   | 0.95                    | 0.82 | 1.09 | 0.45    | 1.2E-03                          | 0.95 | 0.82 | 1.09 | 0.45                     | 0.76 | 0.61 | 0.96 | 0.02               | 0.77 | 0.61 | 0.97 | 0.03                    | 0.78 | 0.57 | 1.06  | 0.11                        | 0.007   | -4.E-04 | 0.014 | 0.06               | 8.0E-04  | -            | -                    |  |  |  |  |
|                   |                     | Pleiotropy out SNPs | 89    | 1.09                    | 0.89 | 1.33 | 0.43    | 3.9E-04                          | 1.08 | 0.89 | 1.32 | 0.43                     | 1.05 | 0.77 | 1.43 | 0.78               | 1.14 | 0.70 | 1.87 | 0.60                    | 1.09 | 0.51 | 2.34  | 0.82                        | 4.2E-04 | -0.012  | 0.013 | 0.95               | 2.0E-04  | -            | -                    |  |  |  |  |
|                   | men                 | UGT1A1 SNP          | 1     | 1.01                    | 0.89 | 1.13 | 0.93    |                                  |      |      |      |                          |      |      |      |                    |      |      |      |                         |      |      |       |                             |         |         |       |                    |          |              |                      |  |  |  |  |
|                   |                     | Non-UGT1A1 SNPs     | 109   | 0.76                    | 0.57 | 1.00 | 0.05    | 0.41                             | 0.76 | 0.57 | 1.00 | 0.05                     | 0.56 | 0.35 | 0.89 | 0.01               | 0.56 | 0.37 | 0.86 | 0.01                    | 0.50 | 0.30 | 0.82  | 0.01                        | 0.014   | 5.E-04  | 0.027 | 0.04               | 0.37     | -            | -                    |  |  |  |  |
|                   |                     | Pleiotropy out SNPs | 87    | 0.88                    | 0.59 | 1.30 | 0.50    | 0.34                             | 0.88 | 0.59 | 1.29 | 0.51                     | 0.74 | 0.41 | 1.34 | 0.33               | 0.65 | 0.23 | 1.82 | 0.41                    | 0.39 | 0.11 | 1.35  | 0.14                        | 0.017   | -0.007  | 0.041 | 0.17               | 0.35     | -            | -                    |  |  |  |  |
|                   | women               | UGT1A1 SNP          | 1     | 1.10                    | 0.95 | 1.28 | 0.20    |                                  |      |      |      |                          |      |      |      |                    |      |      |      |                         |      |      |       |                             |         |         |       |                    |          |              |                      |  |  |  |  |
|                   |                     | Non-UGT1A1 SNPs     | 109   | 1.05                    | 0.74 | 1.48 | 0.80    | 0.41                             | 1.05 | 0.74 | 1.48 | 0.80                     | 0.84 | 0.48 | 1.48 | 0.56               | 0.93 | 0.54 | 1.61 | 0.80                    | 1.03 | 0.55 | 1.92  | 0.93                        | 0.001   | -0.016  | 0.018 | 0.90               | 0.42     | -            | -                    |  |  |  |  |
|                   |                     | Pleiotropy out SNPs | 87    | 1.06                    | 0.65 | 1.72 | 0.83    | 0.39                             | 1.06 | 0.65 | 1.71 | 0.83                     | 1.32 | 0.64 | 2.70 | 0.46               | 1.84 | 0.57 | 5.87 | 0.31                    | 2.21 | 0.48 | 10.17 | 0.31                        | -0.015  | -0.045  | 0.015 | 0.31               | 0.41     | -            | -                    |  |  |  |  |
| Lung cancer       | overall             | UGT1A1 SNP          | 1     | 0.98                    | 0.94 | 1.02 | 0.31    |                                  |      |      |      |                          |      |      |      |                    |      |      |      |                         |      |      |       |                             |         |         |       |                    |          |              |                      |  |  |  |  |
|                   |                     | Non-UGT1A1 SNPs     | 109   | 0.91                    | 0.83 | 1.00 | 0.06    | 1.2E-15                          | 0.91 | 0.83 | 1.00 | 0.06                     | 0.93 | 0.79 | 1.09 | 0.36               | 0.93 | 0.80 | 1.09 | 0.39                    | 0.84 | 0.64 | 1.10  | 0.20                        | 0.002   | -0.002  | 0.007 | 0.29               | <1e-04   | 0.25         | rs200484,rs9267488   |  |  |  |  |
|                   |                     | Pleiotropy out SNPs | 87    | 0.92                    | 0.81 | 1.05 | 0.22    | 1.3E-14                          | 0.92 | 0.81 | 1.05 | 0.23                     | 1.01 | 0.81 | 1.26 | 0.95               | 1.06 | 0.73 | 1.52 | 0.77                    | 0.78 | 0.42 | 1.48  | 0.45                        | 0.003   | -0.005  | 0.011 | 0.43               | <1e-04   | 0.05         | rs200484,rs9267488   |  |  |  |  |
|                   | ever smokers        | UGT1A1 SNP          | 1     | 0.95                    | 0.91 | 1.00 | 0.07    |                                  |      |      |      |                          |      |      |      |                    |      |      |      |                         |      |      |       |                             |         |         |       |                    |          |              |                      |  |  |  |  |
|                   |                     | Non-UGT1A1 SNPs     | 109   | 0.86                    | 0.76 | 0.96 | 0.01    | 2.3E-10                          | 0.86 | 0.76 | 0.97 | 0.01                     | 0.86 | 0.71 | 1.06 | 0.16               | 0.85 | 0.71 | 1.03 | 0.09                    | 0.79 | 0.58 | 1.07  | 0.13                        | 0.003   | -0.003  | 0.009 | 0.35               | <1e-04   | 0.28         | rs200484,rs9267488   |  |  |  |  |
|                   |                     | Pleiotropy out SNPs | 87    | 0.89                    | 0.75 | 1.05 | 0.16    | 2.4E-10                          | 0.89 | 0.76 | 1.05 | 0.17                     | 0.93 | 0.71 | 1.23 | 0.64               | 0.98 | 0.66 | 1.44 | 0.91                    | 0.72 | 0.34 | 1.50  | 0.38                        | 0.004   | -0.006  | 0.015 | 0.38               | <1e-04   | 0.15         | rs200484,rs9267488   |  |  |  |  |
|                   | never smokers       | UGT1A1 SNP          | 1     | 0.99                    | 0.88 | 1.12 | 0.91    |                                  |      |      |      |                          |      |      |      |                    |      |      |      |                         |      |      |       |                             |         |         |       |                    |          |              |                      |  |  |  |  |
|                   |                     | Non-UGT1A1 SNPs     | 109   | 1.01                    | 0.76 | 1.34 | 0.95    | 0.03                             | 1.01 | 0.76 | 1.34 | 0.95                     | 0.86 | 0.53 | 1.40 | 0.56               | 0.94 | 0.60 | 1.48 | 0.80                    | 0.83 | 0.47 | 1.47  | 0.53                        | 0.006   | -0.007  | 0.020 | 0.37               | 0.03     | -            | -                    |  |  |  |  |
|                   |                     | Pleiotropy out SNPs | 87    | 0.97                    | 0.66 | 1.44 | 0.88    | 0.10                             | 0.97 | 0.66 | 1.43 | 0.88                     | 1.18 | 0.63 | 2.23 | 0.61               | 1.28 | 0.48 | 3.42 | 0.62                    | 1.03 | 0.29 | 3.72  | 0.96                        | -0.001  | -0.025  | 0.022 | 0.91               | 0.10     | -            | -                    |  |  |  |  |
|                   | adenocarcinoma      | UGT1A1 SNP          | 1     | 0.99                    | 0.94 | 1.05 | 0.81    |                                  |      |      |      |                          |      |      |      |                    |      |      |      |                         |      |      |       |                             |         |         |       |                    |          |              |                      |  |  |  |  |
|                   |                     | Non-UGT1A1 SNPs     | 109   | 0.96                    | 0.84 | 1.09 | 0.54    | 6.6E-04                          | 0.96 | 0.84 | 1.09 | 0.54                     | 0.90 | 0.72 | 1.13 | 0.38               | 0.91 | 0.74 | 1.11 | 0.35                    | 0.80 | 0.60 | 1.06  | 0.12                        | 0.006   | -3.E-04 | 0.012 | 0.06               | 9.0E-04  | 0.78         | rs676388             |  |  |  |  |
|                   |                     | Pleiotropy out SNPs | 87    | 1.02                    | 0.85 | 1.22 | 0.86    | 1.7E-03                          | 1.02 | 0.85 | 1.22 | 0.87                     | 1.03 | 0.77 | 1.37 | 0.87               | 1.02 | 0.68 | 1.52 | 0.94                    | 0.76 | 0.39 | 1.46  | 0.41                        | 0.006   | -0.005  | 0.017 | 0.26               | 1.5E-03  | 0.15         | rs676388             |  |  |  |  |
|                   | squamous cell       | UGT1A1 SNP          | 1     | 0.97                    | 0.91 | 1.03 | 0.35    |                                  |      |      |      |                          |      |      |      |                    |      |      |      |                         |      |      |       |                             |         |         |       |                    |          |              |                      |  |  |  |  |
|                   |                     | Non-UGT1A1 SNPs     | 109   | 0.85                    | 0.73 | 0.99 | 0.04    | 5.8E-11                          | 0.85 | 0.73 | 0.99 | 0.04                     | 1.01 | 0.78 | 1.30 | 0.95               | 0.99 | 0.77 | 1.26 | 0.91                    | 0.93 | 0.62 | 1.38  | 0.71                        | -0.003  | -0.010  | 0.004 | 0.44               | <1e-04   | 0.25         | rs200484,rs9267488   |  |  |  |  |
|                   |                     | Pleiotropy out SNPs | 87    | 0.80                    | 0.65 | 0.99 | 0.04    | 4.5E-12                          | 0.81 | 0.66 | 0.99 | 0.05                     | 0.99 | 0.70 | 1.42 | 0.97               | 1.08 | 0.65 | 1.80 | 0.77                    | 0.74 | 0.28 | 1.95  | 0.54                        | 0.002   | -0.011  | 0.014 | 0.78               | <1e-04   | 0.17         | rs200484,rs9267488   |  |  |  |  |
| small cell        | UGT1A1 SNP          | 1                   | 0.95  | 0.86                    | 1.05 | 0.32 |         |                                  |      |      |      |                          |      |      |      |                    |      |      |      |                         |      |      |       |                             |         |         |       |                    |          |              |                      |  |  |  |  |
|                   | Non-UGT1A1 SNPs     | 109                 | 0.77  | 0.61                    | 0.97 | 0.03 | 0.02    | 0.77                             | 0.61 | 0.98 | 0.03 | 0.75                     | 0.50 | 1.13 | 0.17 | 0.77               | 0.53 | 1.14 | 0.20 | 0.65                    | 0.40 | 1.06 | 0.09  | 0.005                       | -0.007  | 0.016   | 0.40  | 0.02               | 0.78     | rs9267488    |                      |  |  |  |  |
|                   | Pleiotropy out SNPs | 87                  | 0.95  | 0.68                    | 1.33 | 0.76 | 3.8E-03 | 0.95                             | 0.68 | 1.32 | 0.76 | 1.03                     | 0.61 | 1.73 | 0.93 | 1.00               | 0.43 | 2.31 | 0.99 | 0.72                    | 0.22 | 2.38 | 0.59  | 0.006                       | -0.014  | 0.026   | 0.55  | 4.0E-03            | 0.18     | rs9267488    |                      |  |  |  |  |
| Ovarian cancer    | overall             | UGT1A1 SNP          | 1     | 0.96                    | 0.92 | 1.00 | 0.05    |                                  |      |      |      |                          |      |      |      |                    |      |      |      |                         |      |      |       |                             |         |         |       |                    |          |              |                      |  |  |  |  |
|                   |                     | Non-UGT1A1 SNPs     | 111   | 1.10                    | 1.00 | 1.21 | 0.04    | 6.2E-13                          | 1.10 | 1.00 | 1.21 | 0.04                     | 1.19 | 1.01 | 1.40 | 0.04               | 1.13 | 0.97 | 1.32 | 0.11                    | 1.11 | 0.86 | 1.43  | 0.43                        | 0.000   | -0.005  | 0.005 | 1.00               | <1e-04   | 0.56         | rs2519093,rs7135337  |  |  |  |  |
|                   |                     | Pleiotropy out SNPs | 89    | 1.12                    | 0.98 | 1.27 | 0.10    | 1.9E-06                          | 1.11 | 0.98 | 1.27 | 0.11                     | 1.14 | 0.93 | 1.41 | 0.21               | 0.91 | 0.66 | 1.26 | 0.57                    | 0.93 | 0.55 | 1.57  | 0.78                        | 0.004   | -0.004  | 0.012 | 0.30               | <1e-04   | 0.75         | rs7135337            |  |  |  |  |
|                   | serous              | UGT1A1 SNP          | 1     | 0.94                    | 0.90 | 0.98 | 5.8E-03 |                                  |      |      |      |                          |      |      |      |                    |      |      |      |                         |      |      |       |                             |         |         |       |                    |          |              |                      |  |  |  |  |
|                   |                     | Non-UGT1A1 SNPs     | 111   | 1.12                    | 1.01 | 1.24 | 0.04    | 9.8E-15                          | 1.12 | 1.01 | 1.24 | 0.04                     | 1.22 | 1.01 | 1.47 | 0.04               | 1.19 | 1.01 | 1.41 | 0.05                    | 1.14 | 0.85 | 1.53  | 0.37                        | -0.001  | -0.006  | 0.004 | 0.79               | <1e-04   | 0.53         | rs2519093,rs7135337  |  |  |  |  |
|                   |                     | Pleiotropy out SNPs | 89    | 1.10                    | 0.95 | 1.27 | 0.23    | 2.9E-08                          | 1.09 | 0.95 | 1.26 | 0.24                     | 1.07 | 0.84 | 1.36 | 0.62               | 0.96 | 0.65 | 1.41 | 0.84                    | 0.95 | 0.52 | 1.73  | 0.86                        |         |         |       |                    |          |              |                      |  |  |  |  |

**Figure S1. Scatter plots depicting the genetic associations between bilirubin levels and risk of pancreatic and renal cell cancers, overall and sex subgroups**

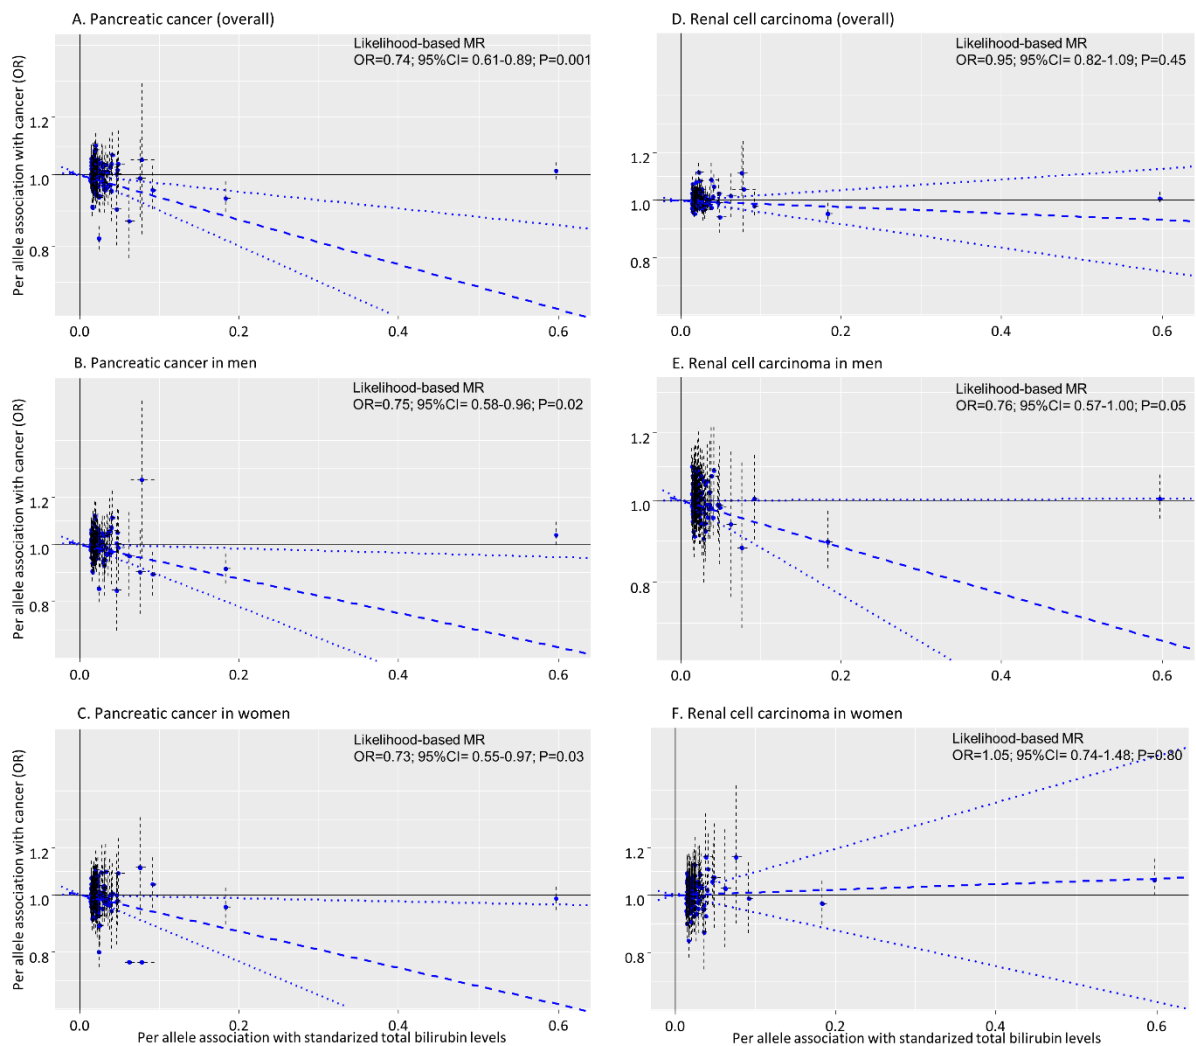

Per allele association of bilirubin SNPs with inverse-normal-transformed bilirubin levels (x axis) and risk of pancreatic cancer and renal cell carcinoma (y axis; logarithmic scale); pancreatic cancer overall (A), pancreatic cancer in men (B), pancreatic cancer in women (C) renal cell carcinoma overall (D), renal cell carcinoma in men (E), renal cell carcinoma in women (F), including the likelihood-based MR estimate (dashed-blue line) and its 95% confidence interval (dotted-blue lines).

**Figure S2. Scatter plots depicting the genetic associations between bilirubin levels and lung cancer risk, overall, smoking subgroups, and histological subtypes**

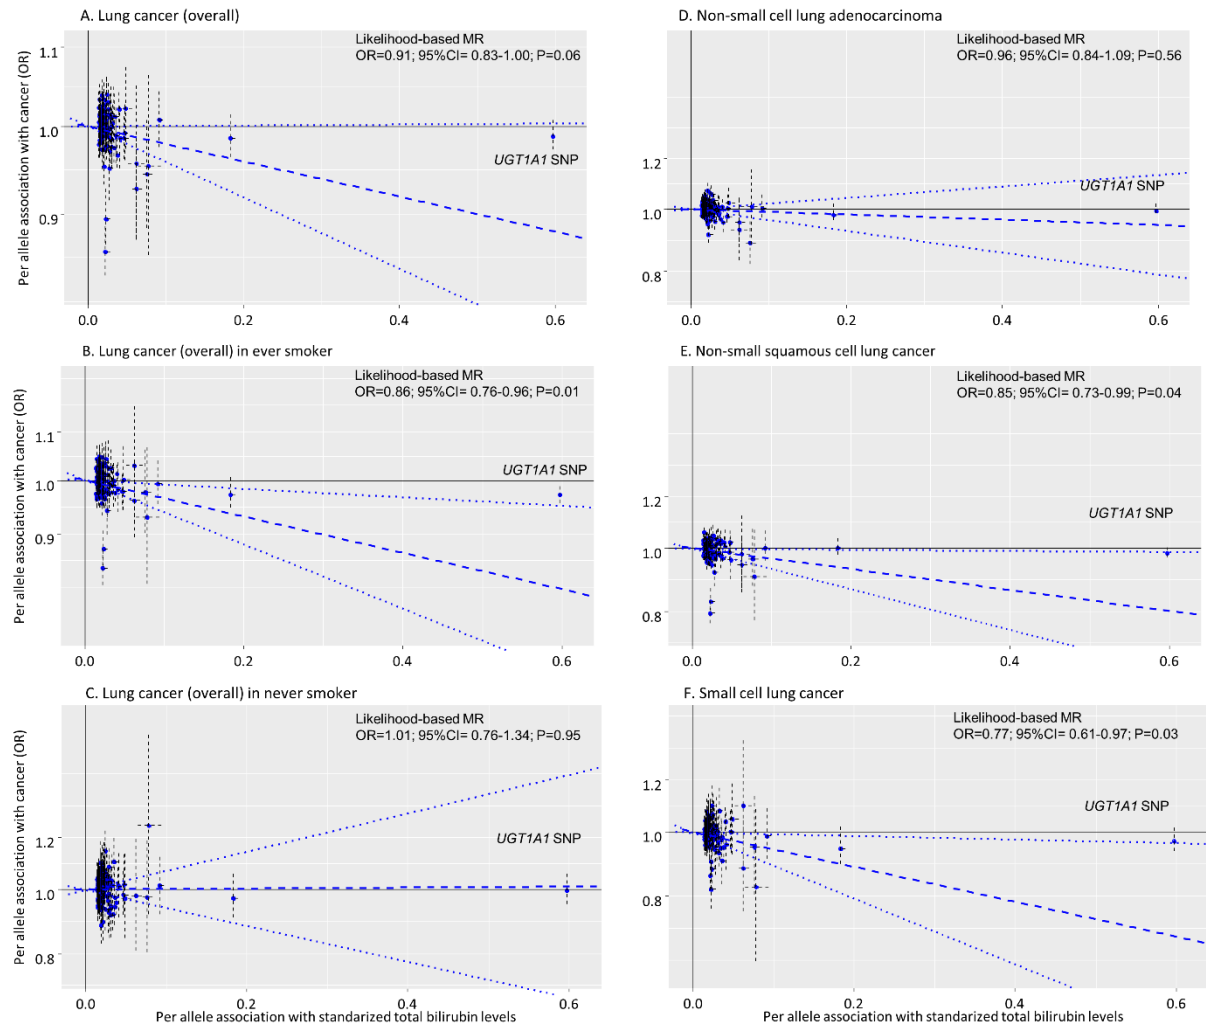

Per allele associations of bilirubin SNPs with inverse-normal-transformed bilirubin levels (x axis) and lung cancer risk (y axis; logarithmic scale); overall (A), in ever smoker (B), in never smoker (C), adenocarcinoma (D), squamous cell lung cancer (E), small cell lung cancer (F), including the likelihood-based MR estimate (dashed-blue line) and its 95% confidence interval (dotted-blue lines).



**Figure S3. Scatter plots depicting the genetic associations between bilirubin levels and risk of ovarian, endometrial, and breast cancers, overall and subtypes**

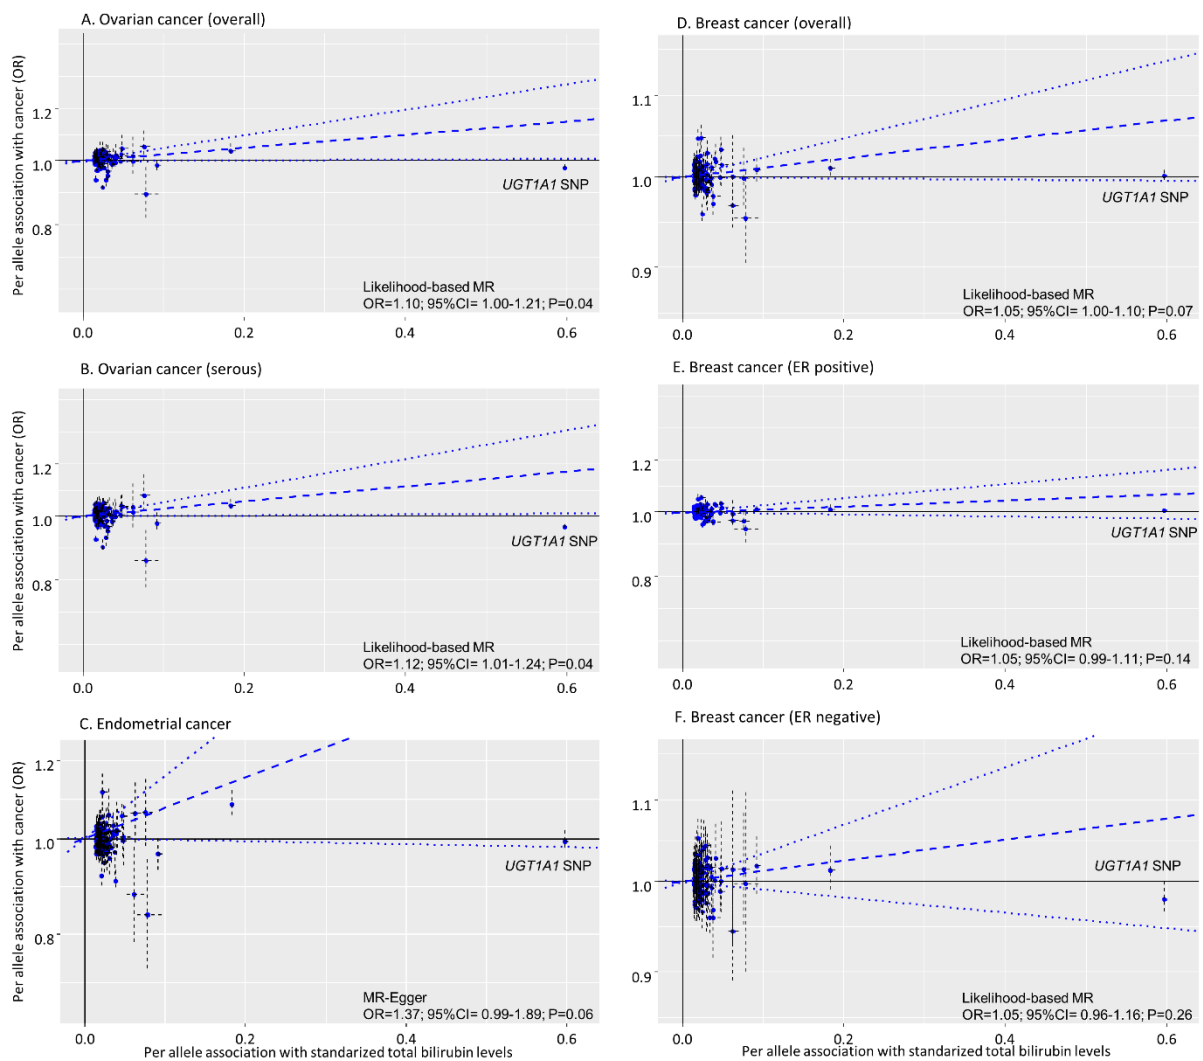

Per allele associations of bilirubin SNPs with inverse-normal-transformed bilirubin levels (x axis) and risk of ovarian, endometrial, and breast cancers (y axis; logarithmic scale); ovarian cancer overall (A), serous ovarian cancer (B), endometrial cancer (C), breast cancer overall (D), ER positive breast cancer (E), ER negative breast cancer (F), including the likelihood-based MR estimate (dashed-blue line) and its 95% confidence interval (dotted-blue lines), with the exception of endometrial cancer, which results are provided by the Egger-MR test.

**Figure S4. Scatter plots depicting the genetic association between bilirubin levels and prostate cancer risk**

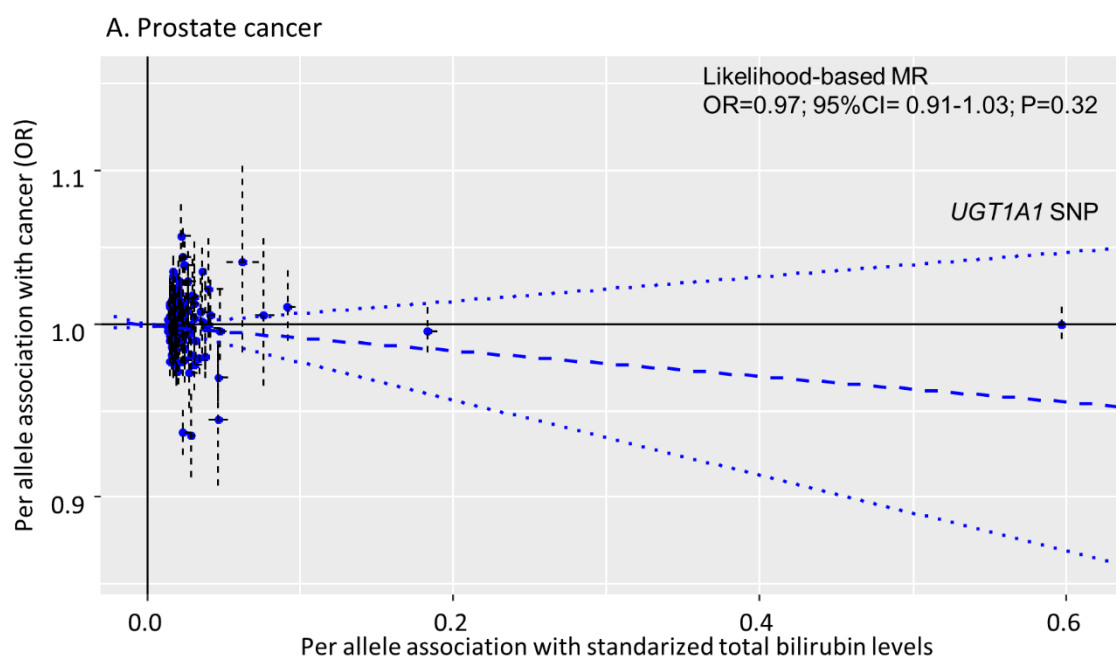

Per allele association of bilirubin SNPs with inverse-normal-transformed bilirubin levels (x axis) and prostate cancer risk (y axis; logarithmic scale), including the likelihood-based MR estimate (dashed-blue line) and its 95% confidence interval (dotted-blue lines).

**Figure S5. Scatter plots depicting the genetic associations between bilirubin levels and risk of Hodgkin's lymphoma, melanoma, and neuroblastoma**

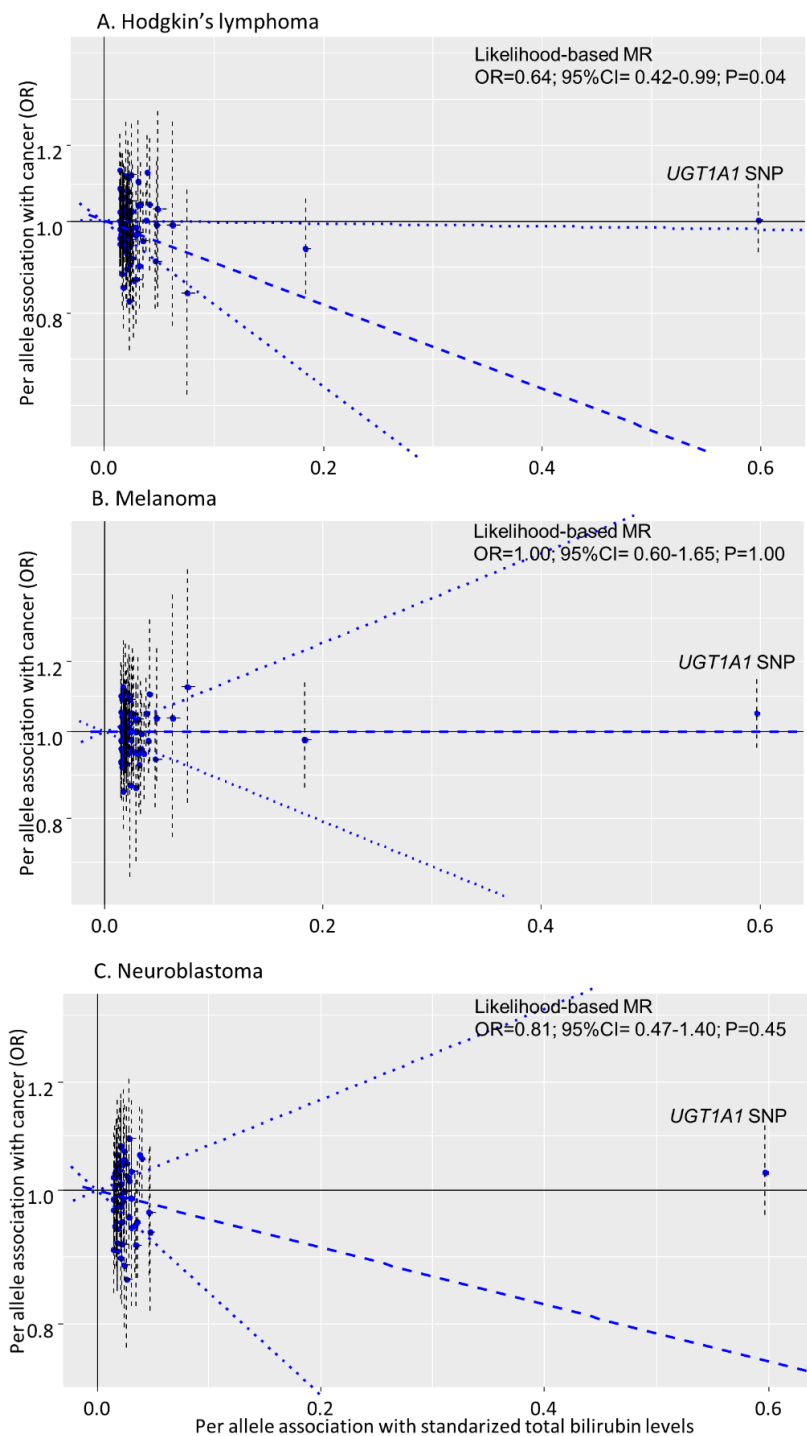

Per allele association of bilirubin SNPs with inverse-normal-transformed bilirubin levels (x axis) and risk of Hodgkin's lymphoma (A), melanoma (B), and neuroblastoma (C) (y axis; logarithmic scale), including the likelihood-based MR estimate (dashed-blue line) and its 95% confidence interval (dotted-blue lines).

## Funding Sources and Acknowledgements

### Genetic Consortia's specific funding sources

Funding for the genome-wide genotyping of the RCC GWAS was provided by the US National Institutes of Health (NIH), National Cancer Institute (U01CA155309) for studies coordinated by IARC and by the intramural research program of the National Cancer Institute, US NIH, for studies coordinated by the NCI.

The breast cancer genome-wide association analyses were supported by the Government of Canada through Genome Canada and the Canadian Institutes of Health Research; the 'Ministère de l'Économie; de la Science et de l'Innovation du Québec' through Genome Québec (PSR-SIIRI-701); The National Institutes of Health (U19 CA148065 and X01HG007492); Cancer Research UK (C1287/A10118, C1287/A16563, and C1287/A10710); and The European Union (HEALTH-F2-2009-223175, H2020 633784, and 634935). All studies and funders are listed in Michailidou et al.

The Prostate cancer genome-wide association analyses are supported by the Canadian Institutes of Health Research; European Commission's Seventh Framework Programme grant agreement n° 223175 (HEALTH-F2-2009-223175); Cancer Research UK Grants (C5047/A7357, C1287/A10118, C1287/A16563, C5047/A3354, C5047/A10692, and C16913/A6135); and The National Institute of Health (NIH) Cancer Post-Cancer GWAS initiative grant (1 U19 CA 148537-01) (the GAME-ON initiative).

The Prostate Cancer Program of Cancer Council Victoria also acknowledge grant support from The National Health and Medical Research Council, Australia (126402, 209057, 251533, 396414, 450104, 504700, 504702, 504715, 623204, 940394, and 614296); VicHealth; Cancer Council Victoria; The Prostate Cancer Foundation of Australia; The Whitten Foundation; PricewaterhouseCoopers; and Tattersall's. EAO, DMK, and EMK acknowledge the Intramural Program of the National Human Genome Research Institute for their support.

Genotyping of the OncoArray was funded by the US National Institutes of Health (NIH) (U19 CA 148537) for ELucidating Loci Involved in Prostate cancer Susceptibility (ELLIPSE) project; Center for Inherited Disease Research (CIDR) (X01HG007492) under contract number (HHSN268201200008I); and by Cancer Research UK grant (A8197/A16565). Additional analytic support was provided by NIH NCI (U01 CA188392) [Schumacher].

The Breast and Prostate Cancer Cohort (BPC3) Consortium was supported by the U.S. National Institutes of Health, National Cancer Institute (cooperative agreements U01-CA98233 to D.J.H., U01-CA98710 to S.M.G., U01-CA98216 to E.R., and U01-CA98758 to B.E.H.); and Intramural Research Program of NIH/National Cancer Institute, Division of Cancer Epidemiology and Genetics.

CAPS GWAS study was supported by the Swedish Cancer Foundation (09-0677, 11-484, 12-823); the Cancer Risk Prediction Center (CRiSP; [www.crispcenter.org](http://www.crispcenter.org)); a Linneus Centre (Contract ID 70867902) financed by the Swedish Research Council; and Swedish Research Council (K2010-70X-20430-04-3, and 2014-2269).

Prostate Cancer Genome-wide Association Study for Uncommon Susceptibility Loci (PEGASUS) was supported by the Intramural Research Program, Division of Cancer Epidemiology and Genetics, National Cancer Institute; and National Institutes of Health.

The iCOGS and OncoArray endometrial cancer analysis were supported by NHMRC project grants (ID#1031333; and ID#1109286). Funding for the iCOGS infrastructure came from: the European Community's Seventh Framework Programme (223175) (HEALTH-F2-2009-223175) [COGS]; Cancer Research UK (C1287/A10118, C1287/A 10710, C12292/A11174, C1281/A12014, C5047/A8384, C5047/A15007, C5047/A10692, and C8197/A16565); the National Institutes of Health (CA128978); and Post-Cancer GWAS initiative (1U19 CA148537, 1U19 CA148065 and 1U19 CA148112 - the GAME-ON initiative); the Department of Defence (W81XWH-10-1-0341); the Canadian Institutes of Health Research (CIHR) for the CIHR Team in Familial Risks of Breast Cancer; Komen Foundation for the Cure; the Breast Cancer Research Foundation; and the Ovarian Cancer Research Fund. OncoArray genotyping of ECAC cases was performed with the generous assistance of the Ovarian Cancer Association Consortium (OCAC). We particularly thank the efforts of Cathy Phelan. The OCAC OncoArray genotyping project was funded through grants from the US National Institutes of Health (CA1X01HG007491-01, U19-CA148112, R01-CA149429, and R01-CA058598); Canadian Institutes of Health Research (MOP-86727); and the Ovarian Cancer Research Fund. CIDR genotyping for the Oncoarray was conducted under contract 268201200008I. OncoArray genotyping of the BCAC controls was funded by Genome Canada Grant (GPH-129344, NIH Grant U19 CA148065, and Cancer UK Grant C1287/A16563).

Stage 1 and stage 2 case genotyping was supported by the NHMRC (ID#552402 and ID#1031333). Control data were generated by the Wellcome Trust Case Control Consortium (WTCCC); and a full list of the investigators who contributed to the generation of the data is available from the WTCCC website. We acknowledge use of DNA from the British 1958 Birth Cohort collection, funded by the Medical Research Council grant (G0000934); and the Wellcome Trust grant (068545/Z/02) - funding for this project was provided by the Wellcome Trust under award 085475. NSECG was supported (EU FP7 CHIBCHA), Wellcome Trust Centre for Human Genetics Core Grant (090532/Z/09Z); and CORGI was funded by Cancer Research UK. We thank Nick Martin, Dale Nyholt and Anjali Henders for access to GWAS data from QIMR Controls. Recruitment of the QIMR controls was supported by the NHMRC. The University of Newcastle; the Gladys M Brawn Senior Research Fellowship scheme; The

Vincent Fairfax Family Foundation; the Hunter Medical Research Institute; and the Hunter Area Pathology Service all contributed towards the costs of establishing the Hunter Community Study. The WHI program is funded by the National Heart, Lung, and Blood Institute; the US National Institutes of Health and the US Department of Health and Human Services (HHSN268201100046C, HHSN268201100001C, HHSN268201100002C, HHSN268201100003C, HHSN268201100004C and HHSN271201100004C). This work was also funded by NCI U19 CA148065-01. This research has been conducted using the UK Biobank Resource under applications 5122 and 9797.

ANECs recruitment was supported by project grants from the NHMRC (ID#339435); The Cancer Council Queensland (ID#4196615); and Cancer Council Tasmania (ID#403031 and ID#457636). SEARCH recruitment was funded by a programme grant from Cancer Research UK (490/A10124). The Bavarian Endometrial Cancer Study (BECS) was partly funded by the ELAN fund of the University of Erlangen. The Hannover-Jena Endometrial Cancer Study was partly supported by the Rudolf Bartling Foundation. The Leuven Endometrium Study (LES) was supported by the Verelst Foundation for endometrial cancer. The Mayo Endometrial Cancer Study (MECS) and Mayo controls (MAY) were supported by grants from the National Cancer Institute of United States Public Health Service (R01 CA122443, P30 CA15083, P50 CA136393, and GAME-ON the NCI Cancer Post-GWAS Initiative U19 CA148112), the Fred C and Katherine B Andersen Foundation; the Mayo Foundation; and the Ovarian Cancer Research Fund with support of the Smith family, in memory of Kathryn Sladek Smith. MoMaTEC received financial support from a Helse Vest Grant; the University of Bergen; Melzer Foundation; The Norwegian Cancer Society (Harald Andersens legat); and The Research Council of Norway and Haukeland University Hospital. The Newcastle Endometrial Cancer Study (NECS) acknowledges contributions from the University of Newcastle; The NBN Children's Cancer Research Group; Ms Jennie Thomas; and the Hunter Medical Research Institute. RENDOCAS was supported through the regional agreement on medical training and clinical research (ALF) between Stockholm County Council and Karolinska Institutet (20110222, 20110483, 20110141, and DF 07015); The Swedish Labor Market Insurance (100069)); and The Swedish Cancer Society (11 0439). The Cancer Hormone Replacement Epidemiology in Sweden Study (CAHRES; formerly called The Singapore and Swedish Breast/Endometrial Cancer Study; and SASBAC) was supported by funding from the Agency for Science, Technology and Research of Singapore (A\*STAR); and the US National Institutes of Health and the Susan G. Komen Breast Cancer Foundation.

The Nurses' Health Study (NHS) is supported by the NCI, NIH (UM1 CA186107, P01 CA087969, R01 CA49449, 1R01 CA134958, and 2R01 CA082838). The authors thank the participants and staff of the Nurses' Health Study for their valuable contributions as well as the following state cancer registries for their help: AL, AZ, AR, CA, CO, CT, DE, FL, GA, ID, IL, IN, IA, KY, LA, ME, MD, MA, MI, NE, NH, NJ, NY, NC, ND, OH, OK, OR, PA, RI, SC, TN, TX, VA, WA, WY. The authors assume full responsibility for analyses and interpretation of these data. The authors also thank Channing Division of Network Medicine; Department of Medicine, Brigham and Women's Hospital; and Harvard Medical School. Finally, the authors also acknowledge Pati Soule and Hardeep Ranu for their laboratory assistance. The Connecticut Endometrial Cancer Study was supported by NCI, NIH (RO1CA98346). The Fred Hutchinson Cancer Research Center (FHCRC) is supported by NCI, NIH (NIH RO1 CA105212, RO1 CA 87538, RO1 CA75977, RO3 CA80636, NO1 HD23166, R35 CA39779, KO5 CA92002); and funds from the Fred Hutchinson Cancer Research Center. The Multiethnic Cohort Study (MEC) is supported by the NCI, NCI (CA54281, CA128008, and 2R01 CA082838). The California Teachers Study (CTS) is supported by NCI, NIH (2R01 CA082838, R01 CA91019, and R01 CA77398); and contract 97-10500 from the California Breast Cancer Research Fund. The Polish Endometrial Cancer Study (PECS) is supported by the Intramural Research Program of the NCI. The Prostate, Lung, Colorectal, and Ovarian Cancer Screening Trial (PLCO) is supported by the Extramural and the Intramural Research Programs of the NCI.

We would also like to thank the following for funding support: The Institute of Cancer Research and The Everyman Campaign; The Prostate Cancer Research Foundation; Prostate Research Campaign UK (now Prostate Action); The Orchid Cancer Appeal; The National Cancer Research Network UK; and The National Cancer Research Institute (NCRI) UK. We are grateful for support of National Institute for Health Research (NIHR) funding to the NIHR Biomedical Research Centre at The Institute of Cancer Research and The Royal Marsden NHS Foundation Trust.

We thank ILCCO-TRICL consortium; The PRACTICAL consortium; CRUK; BPC3; CAPS; and PEGASUS.

#### For the Renal Cancer Consortium:

##### Agricultural Health Study

This research was supported by the Intramural Research Program of the NIH, National Cancer Institute, Division of Cancer Epidemiology and Genetics (Z01CP010119).

##### ATBC

The ATBC Study was supported by funding provided by the Intramural Research Program of the NCI, NIH, and through U.S. Public Health Service contracts (N01-CN-45165, N01-RC-45035 and N01-RC-37004) from the NCI.

Supplementary Materials, Seyed Khoei et al., Genetically raised circulating bilirubin levels and risk of ten cancers: a Mendelian randomization study

#### BioVU

The dataset used in the analyses described were obtained from the Vanderbilt University Medical Center resource BioVU, which is supported by institutional funding, the 1S10RR025141-01 instrumentation award, and by the Vanderbilt CTSA grant UL1 TR000445 from NCATS/NIH. Sample processing and phenotyping algorithm development was supported by institutional funding for TLE.

Center 'Bioengineering' of the Russian Academy of Sciences/Kurchatov Scientific Center

The work conducted for this study was supported by the grant Russian Scientific Fund 14-14- 01202.

Centre National de Genotypage, France

We thank Jean Guillaume Garnier and Delphine Bacq-Daian for their work on the IARC-2 scan.

#### ConFIRM/MCCS

The ConFIRM study, also known as CARES, was supported by the Victorian Cancer Agency (PTCB08\_05), the Australian National Health and Medical Research Council (Project Grant 1011626). We acknowledge the contribution of Professor Graham Giles in supporting this work and of Ms Olive Schmid and Ms Jennifer Walsh for the project management.

The Melbourne Collaborative Cohort Study (MCCS) recruitment was funded by VicHealth and Cancer Council Victoria. The MCCS was further supported by Australian NHMRC grants 209057, 251553 and 504711 and by infrastructure provided by Cancer Council Victoria.

#### CPS-II

The Cancer Prevention Study II Nutrition Cohort is supported by the American Cancer Society.

The authors thank all of the men and women in the Cancer Prevention Study II Nutrition Cohort for their many years of dedicated participation in the study.

Health Professionals Follow-up Study (HPFS) and Nurses' Health Study (NHS)

The HPFS is supported by National Institutes of Health, National Cancer Institute grant UM1 CA167552. The NHS is supported by National Institutes of Health, National Cancer Institute grants UM1 CA186107 and P01 CA87969. We would like to thank the following state cancer registries for their help: AL, AZ, AR, CA, CO, CT, DE, FL, GA, ID, IL, IN, IA, KY, LA, ME, MD, MA, MI, NE, NH, NJ, NY, NC, ND, OH, OK, OR, PA, RI, SC, TN, TX, VA, WA, WY. The authors assume full responsibility for analyses and interpretation of these data.

#### K2 study

This study was supported by the EU FP7 under grant agreement number 241669 (the CAGEKID project). In Czech Republic, this work was also supported by MH CZ—DRO (MMCI, 00209805) and by the project MEYS – NPS I – LO1413, Czech Republic.

#### Leeds Cohort

The infrastructure support from Cancer Research UK as part of the Leeds Centre and Experimental Cancer Medicine Centre funding is gratefully acknowledged together with the Leeds Multidisciplinary Research Tissue Bank, all patients who consented to take part in the research studies and the staff of the Urology and Oncology Departments in Leeds Teaching Hospitals Trust.

#### Mayo Clinic

This study was partially supported by National Institutes of Health: R21CA176422 (JEEP) and R01CA134466 (ASP). The authors acknowledge the Mayo Clinic Comprehensive Cancer Center Biospecimens Accessioning and Processing Shared Resource and the Pathology Research Core Shared Resource.

#### MD Anderson

This work was supported in part by the NIH (grant R01 CA170298) and the Center for Translational and Public Health Genomics, Duncan Family Institute for Cancer Prevention and Risk Assessment, The University of Texas MD Anderson Cancer Center.

#### NCI/IARC RCC Study in Central Europe (CE)

This project was supported by the Intramural Research Program of the NIH and the National Cancer Institute.

#### Physicians' Health Study (PHS)

This study was supported by grants CA 097193, CA 34944, CA 40360, HL 26490, and HL 34595 from the National Institutes of Health, Bethesda, MD.

Supplementary Materials, Seyed Khoei et al., Genetically raised circulating bilirubin levels and risk of ten cancers: a Mendelian randomization study

#### PLCO

This research was supported by the Intramural Research Program of the National Cancer Institute and by contracts from the Division of Cancer Prevention, National Cancer Institute, NIH, DHHS.

#### SEARCH

This study is funded by Cancer Research UK (C490/A16651).

#### UK GWAS

We acknowledge support from the Medical Research Council (MRC), Cancer Research UK, an educational grant from Bayer and NHS funding for the Royal Marsden Biomedical Research Centre and Cambridge University Health Partners. JL is supported by the NIHR RM/CR Biomedical Research Centre for Cancer.

#### US Kidney Cancer Study

The NCI United States Kidney Cancer Study was supported by the Intramural Research Program of the National Institutes of Health and the National Cancer Institute under the following contracts: N02-CP-10128 (Westat, Inc.), N02-CP-11004 (Wayne State University), and N02-CP-11161 (University of Illinois at Chicago).

#### Van Andel Research Institute (VARI)

The authors would like to thank Dr. Kyle Furge for his role in this project as well as Drs. Anthony Avallone, John Ludlow and Philip Wise for contributing samples for this project.

#### Women's Health Initiative (WHI)

The WHI program is funded by the National Heart, Lung, and Blood Institute, National Institutes of Health, U.S. Department of Health and Human Services through contracts HHSN268201100046C, HHSN268201100001C, HHSN268201100002C, HHSN268201100003C, HHSN268201100004C, and HHSN271201100004C. For a list of all the investigators who have contributed to WHI science, please visit:

<https://www.whi.org/researchers/Documents%20%20Write%20a%20Paper/WHI%20Investigator%20Long%20List.pdf>.

#### Women's Health Study (WHS)

The study is supported by grants CA-047988, HL-043851, HL-080467, HL-099355, and UM1 CA182913 from the National Institutes of Health, Bethesda, MD.
